# Supplementary material for: Spatial tuning of adsorption enthalpies by exploiting spectator group effects in organosilica carbon capture materials
Source: Royal Society of Chemistry journal article supplement (doi:10.1039/d4ta01381f), 2024-01-01
Supplement: d4ta01381f1.pdf [file d4ta01381f1.pdf]

# Spatial Tuning of Adsorption Enthalpies by Exploiting Spectator Group Effects in Organosilica Carbon Capture Materials

Mario Evers,<sup>a</sup> Karin Hauser<sup>b</sup>, Wolfgang G. Hinze,<sup>b</sup> Nele Klinkenberg,<sup>b</sup> Yasar Krysiak,<sup>a</sup> Daniel Mombers,<sup>a,†</sup> Sebastian Polarz<sup>a,‡,\*</sup>

**SUPPORTING INFORMATION**

**Fig. S1. Analytical Data for AzSil.**

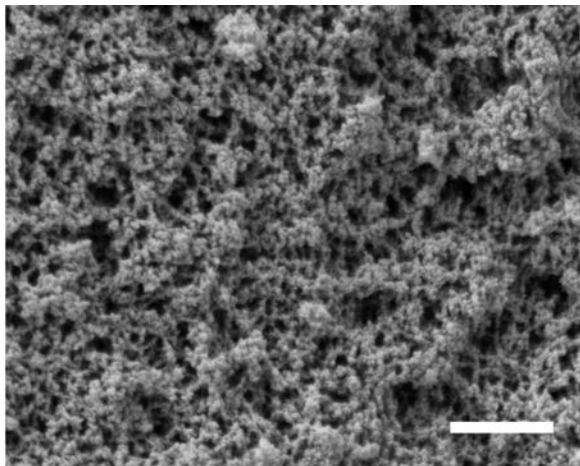

(a) SEM micrograph; scalebar = 1  $\mu\text{m}$ .

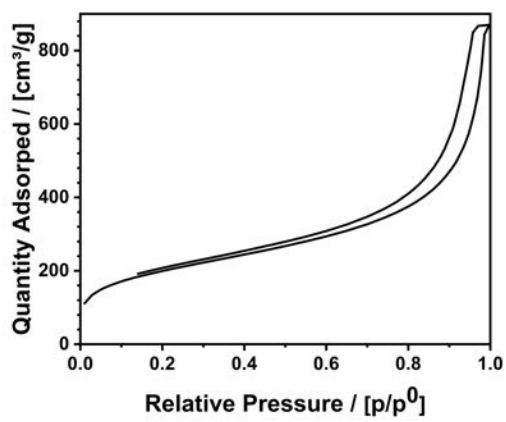

(b) N<sub>2</sub> physisorption isotherm;  $A_{\text{BET}} = 694 \text{ m}^2/\text{g}$ .

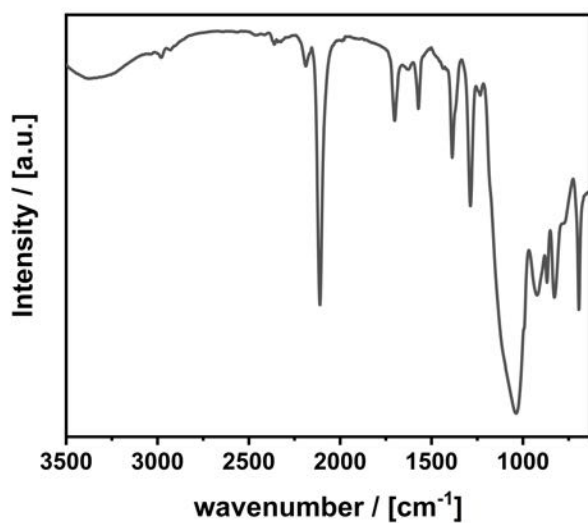

- (c) FT-IR spectrum.  $\nu$  ( $\text{cm}^{-1}$ ) = 1044 (Si-O), 1316 ( $\text{C}(\text{sp}^3)\text{-C}(\text{sp}^3)$ ), 1466 ( $\text{C}(\text{sp}^3)\text{C}(\text{sp}^3)$ ), 2100 ( $\text{N}_3$ ) 2851, 2920 (C-H), 3300 (OH).

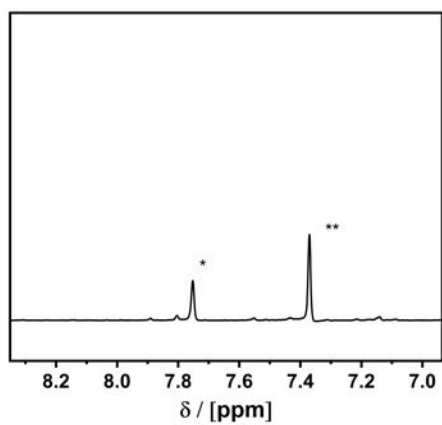

- (d)  $^1\text{H-NMR}$  of dissolved material; (\*) : 7.35 (m, 2H, o-arom. CH), (\*\*) : 7.75 (m, 1H, p-arom. CH).

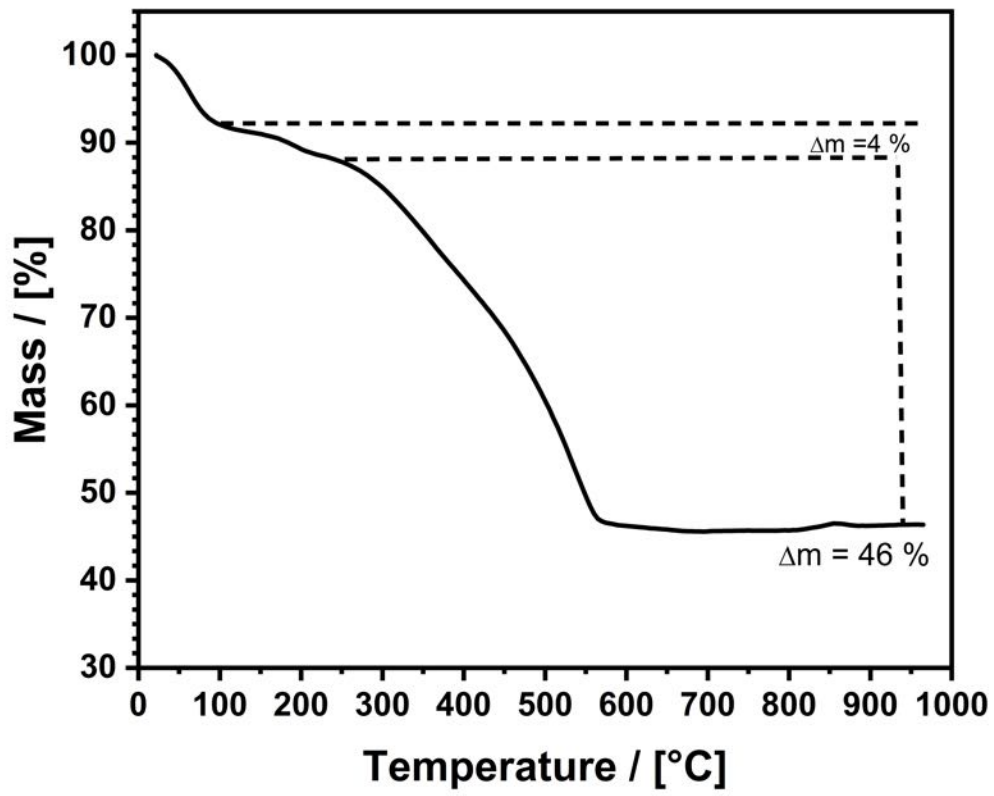

(e) TGA in air.

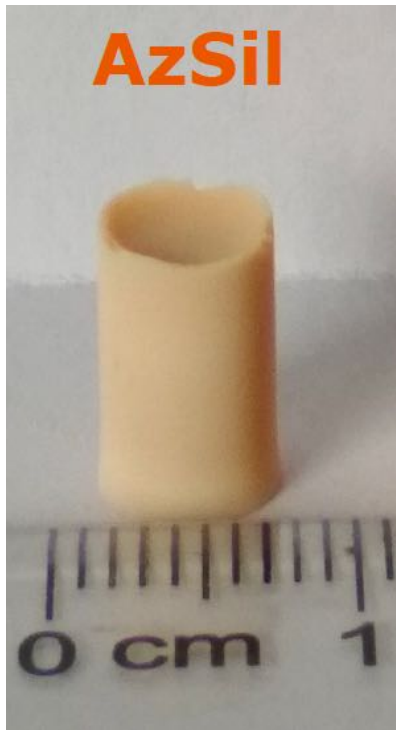

(f) Photographic image of monolithic aerogel obtained after supercritical drying.

**Fig. S2. Analytical Data for AmSil.**

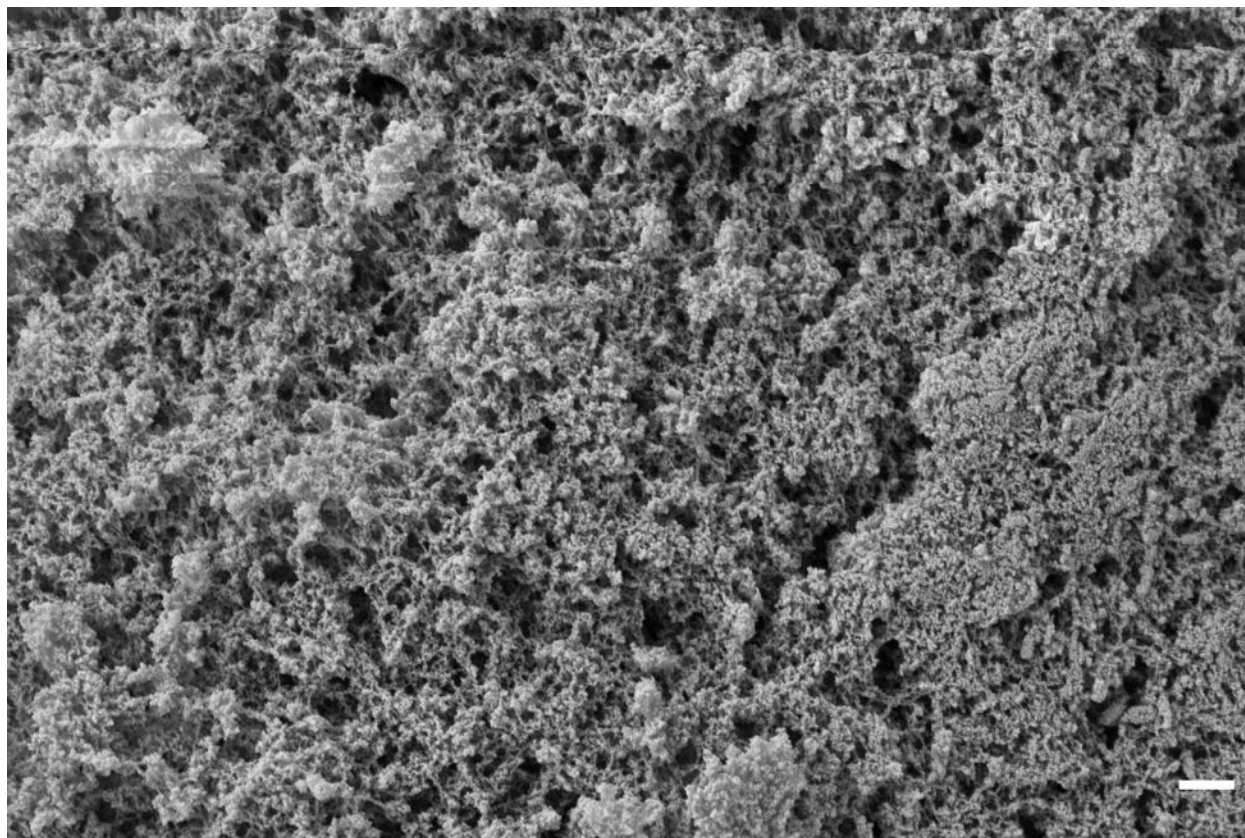

(a) SEM micrograph; scalebar = 1  $\mu\text{m}$ .

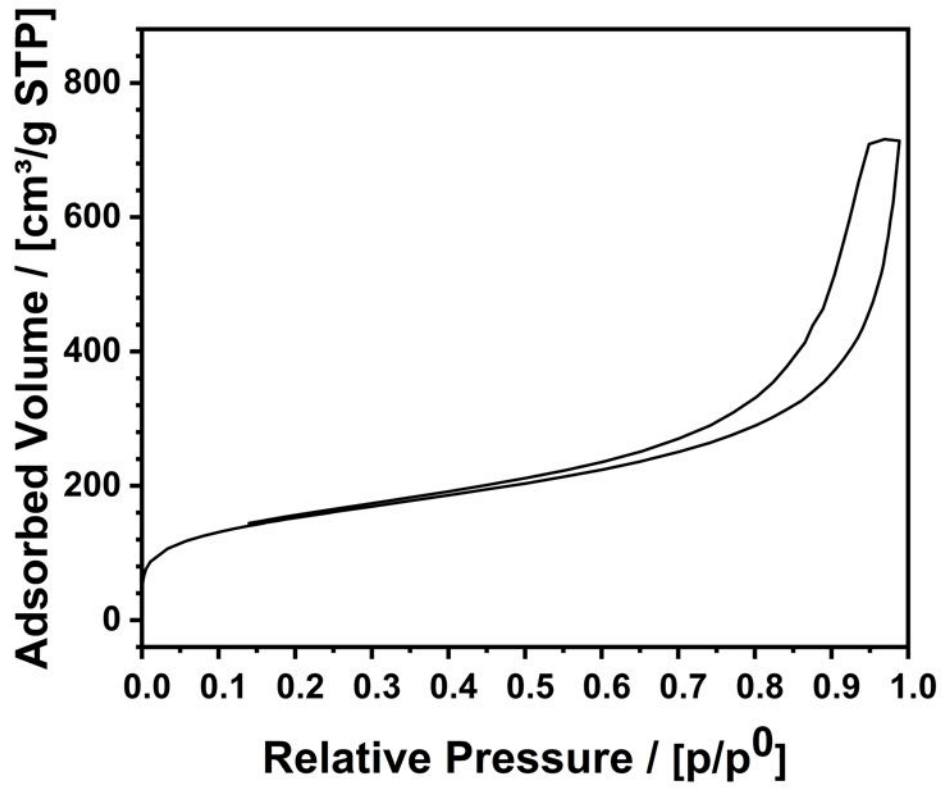

(b) N<sub>2</sub> physisorption isotherm;  $A_{\text{BET}} = 527 \text{ m}^2/\text{g}$ .

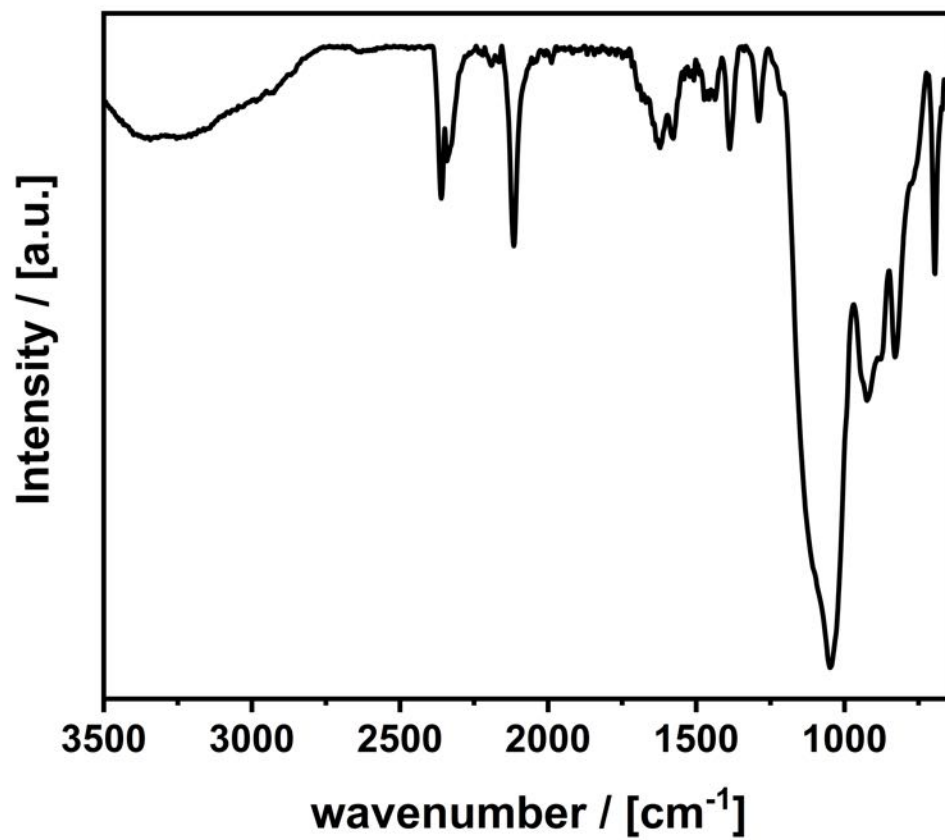

(c) FT-IR spectrum.  $\nu$  (cm<sup>-1</sup>) = 1044 (Si-O), 1316 (C(sp<sup>3</sup>)-C(sp<sup>3</sup>)), 1466 (C(sp<sup>3</sup>)C(sp<sup>3</sup>)), 2100 (N<sub>3</sub>) 2851, 2920 (C-H), 3300 (OH).



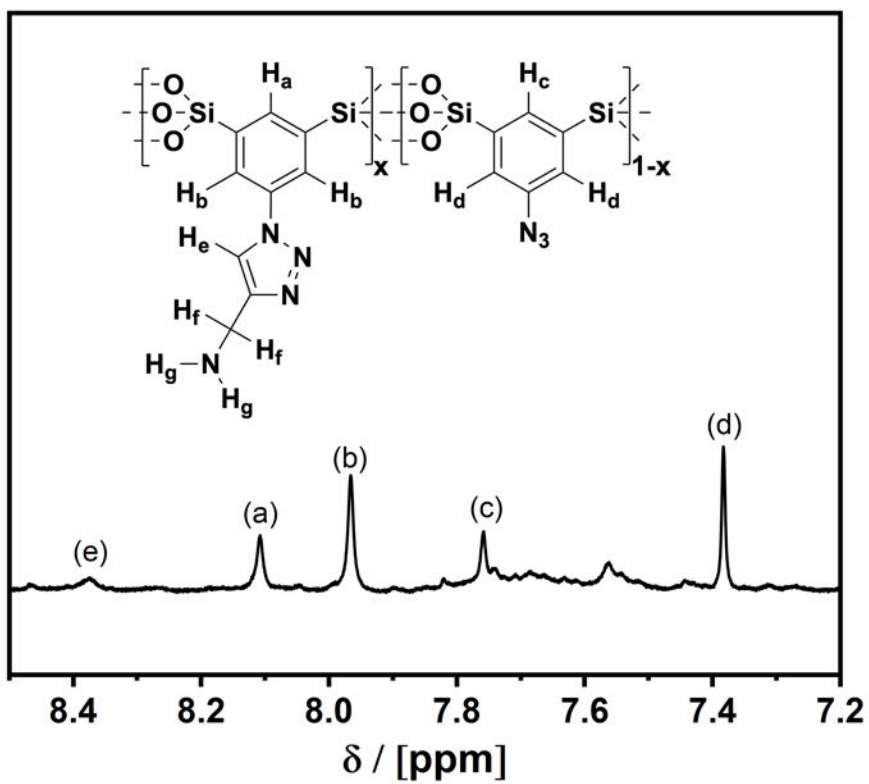

(d) <sup>1</sup>H-NMR of dissolved material; (\*) : 7.35 (m, 2H, o-arom. CH), (\*\*): 7.75 (m, 1H, p-arom. CH).

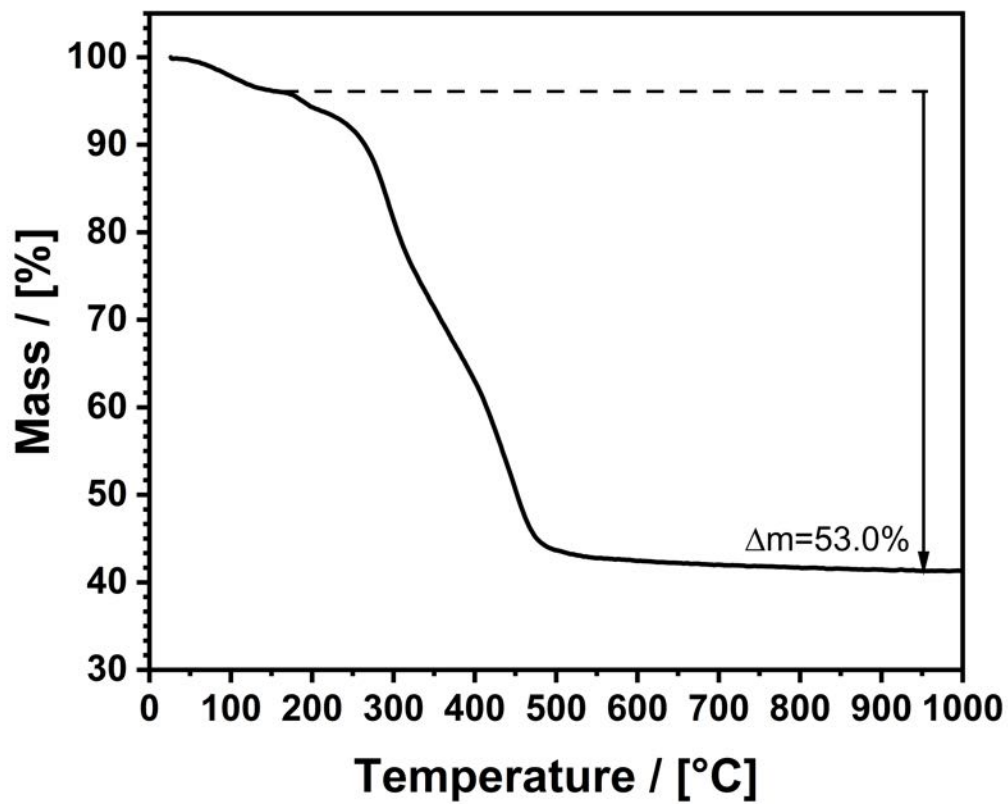

(e) TGA in air.

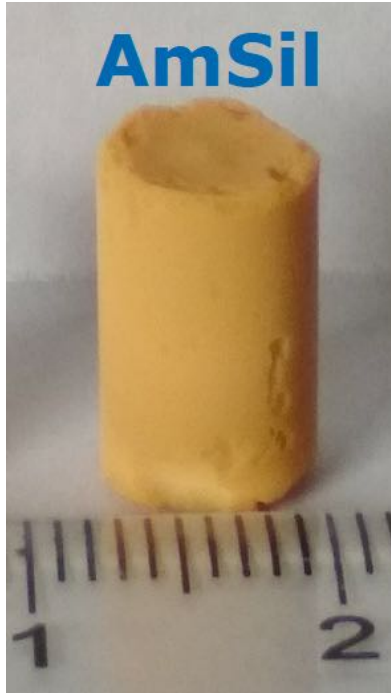

(f) Photographic image of monolithic aerogel obtained after supercritical drying.

**Fig. S3. Analytical Data for AmSP(a)Sil.**

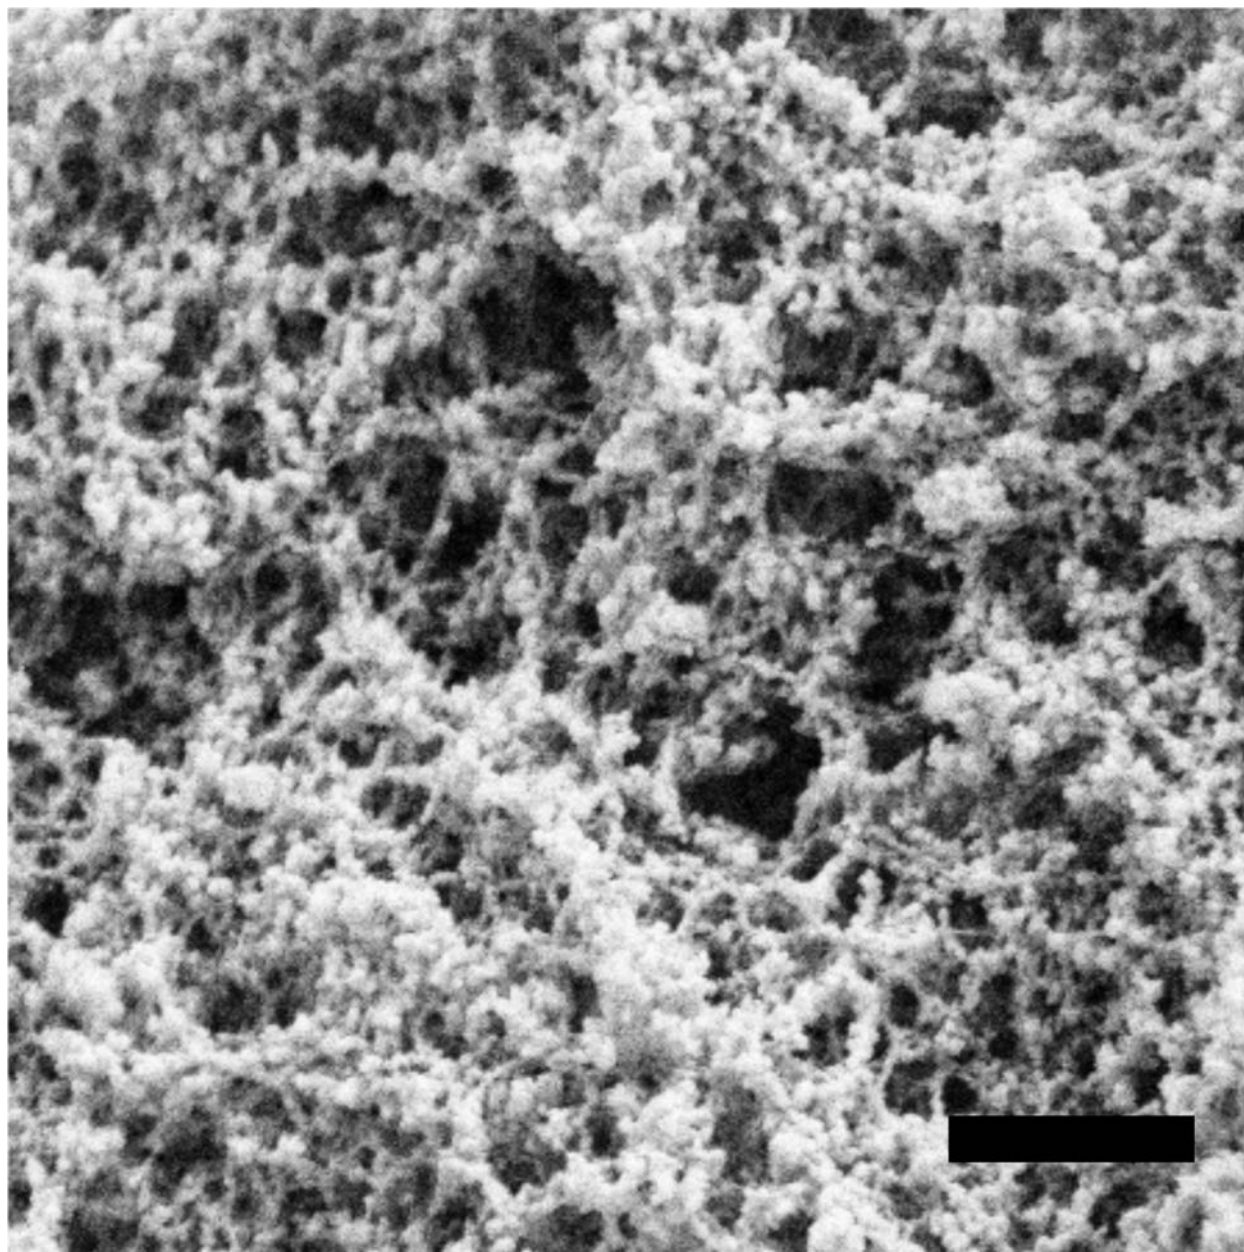

(a) SEM micrograph; scalebar = 1  $\mu\text{m}$ .

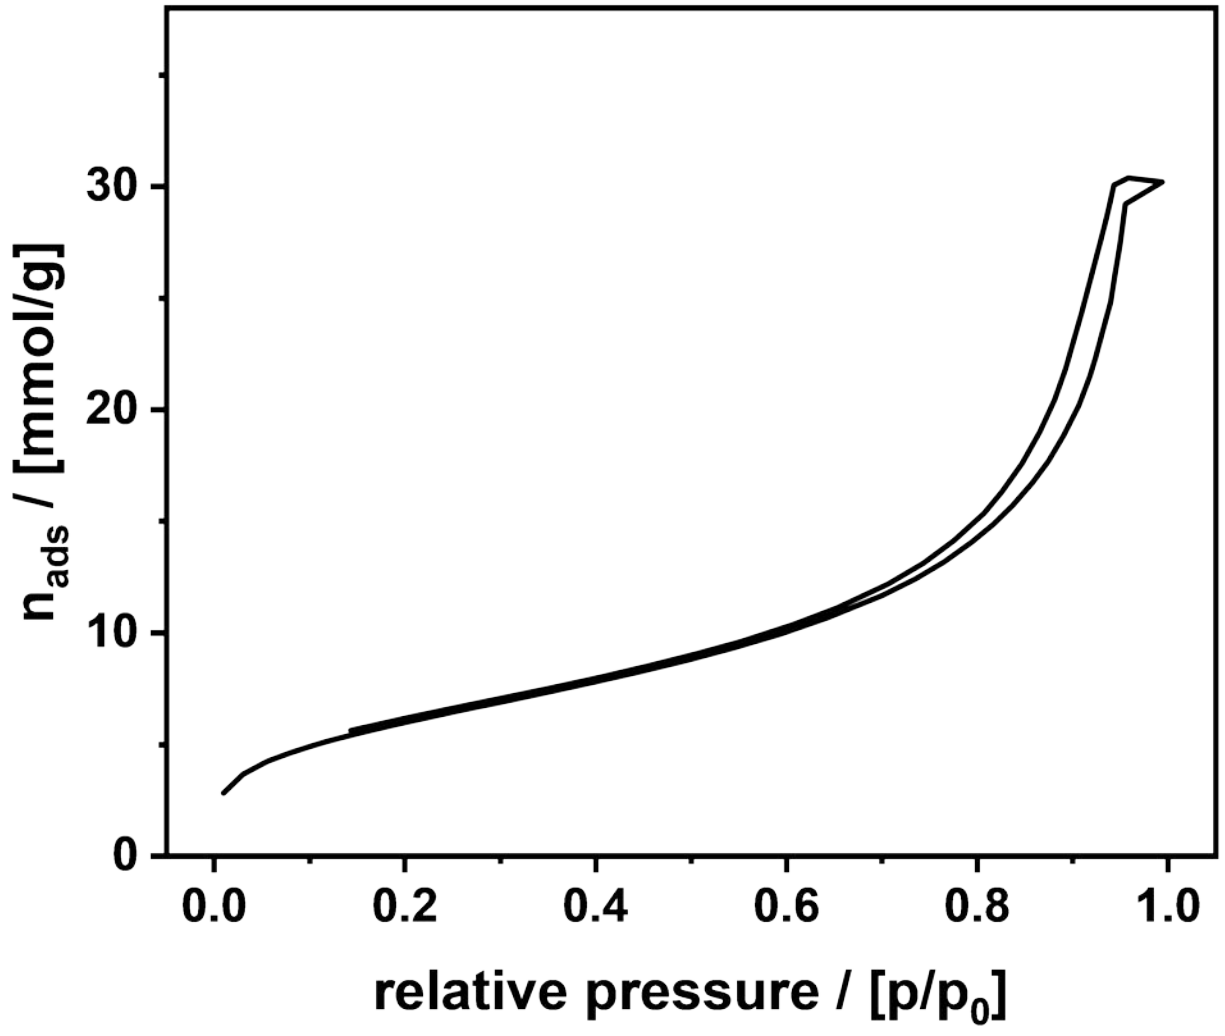

(b) N<sub>2</sub> physisorption isotherm;  $A_{\text{BET}} = 505 \text{ m}^2/\text{g}$ .

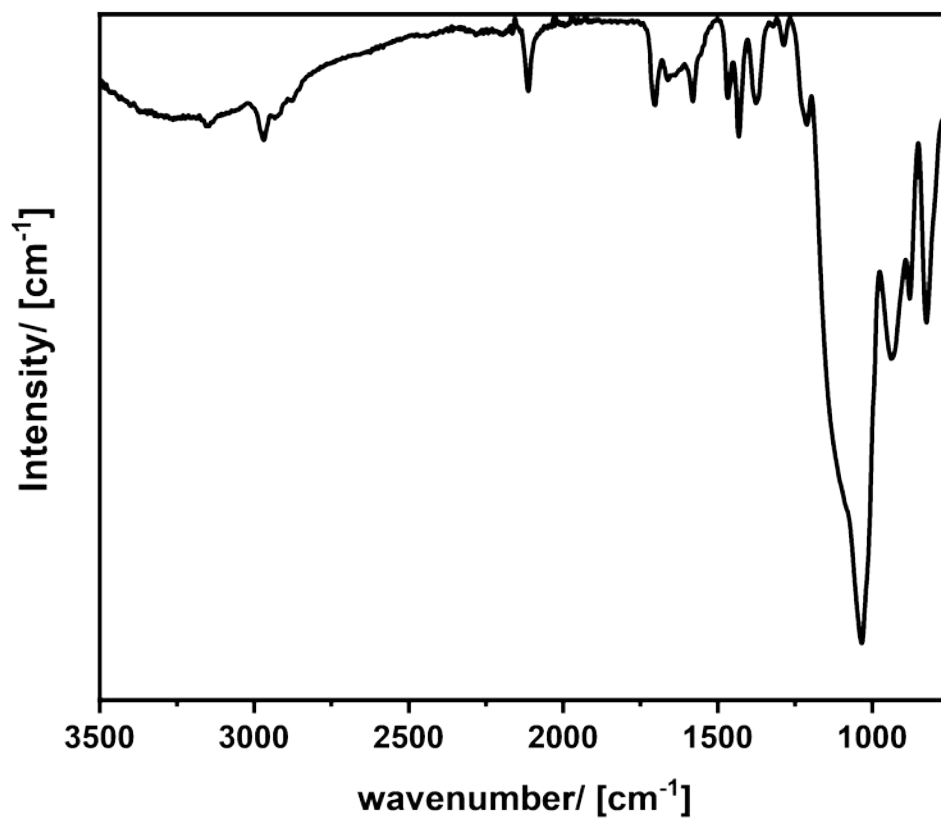

(c) FT-IR spectrum.

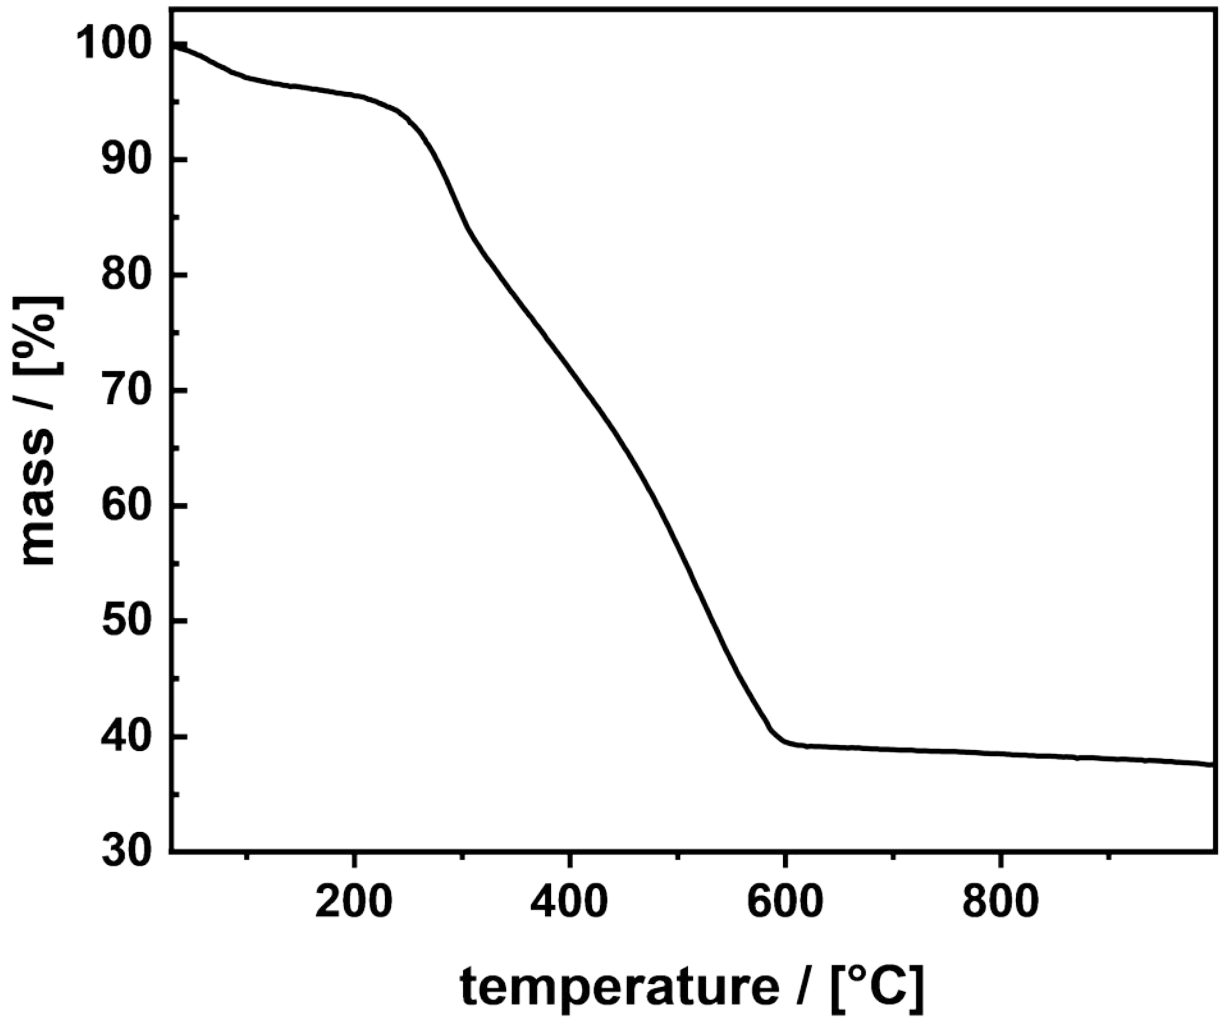

(d) TGA in air.

**Fig. S4. Analytical Data for AmSP(b)Sil.**

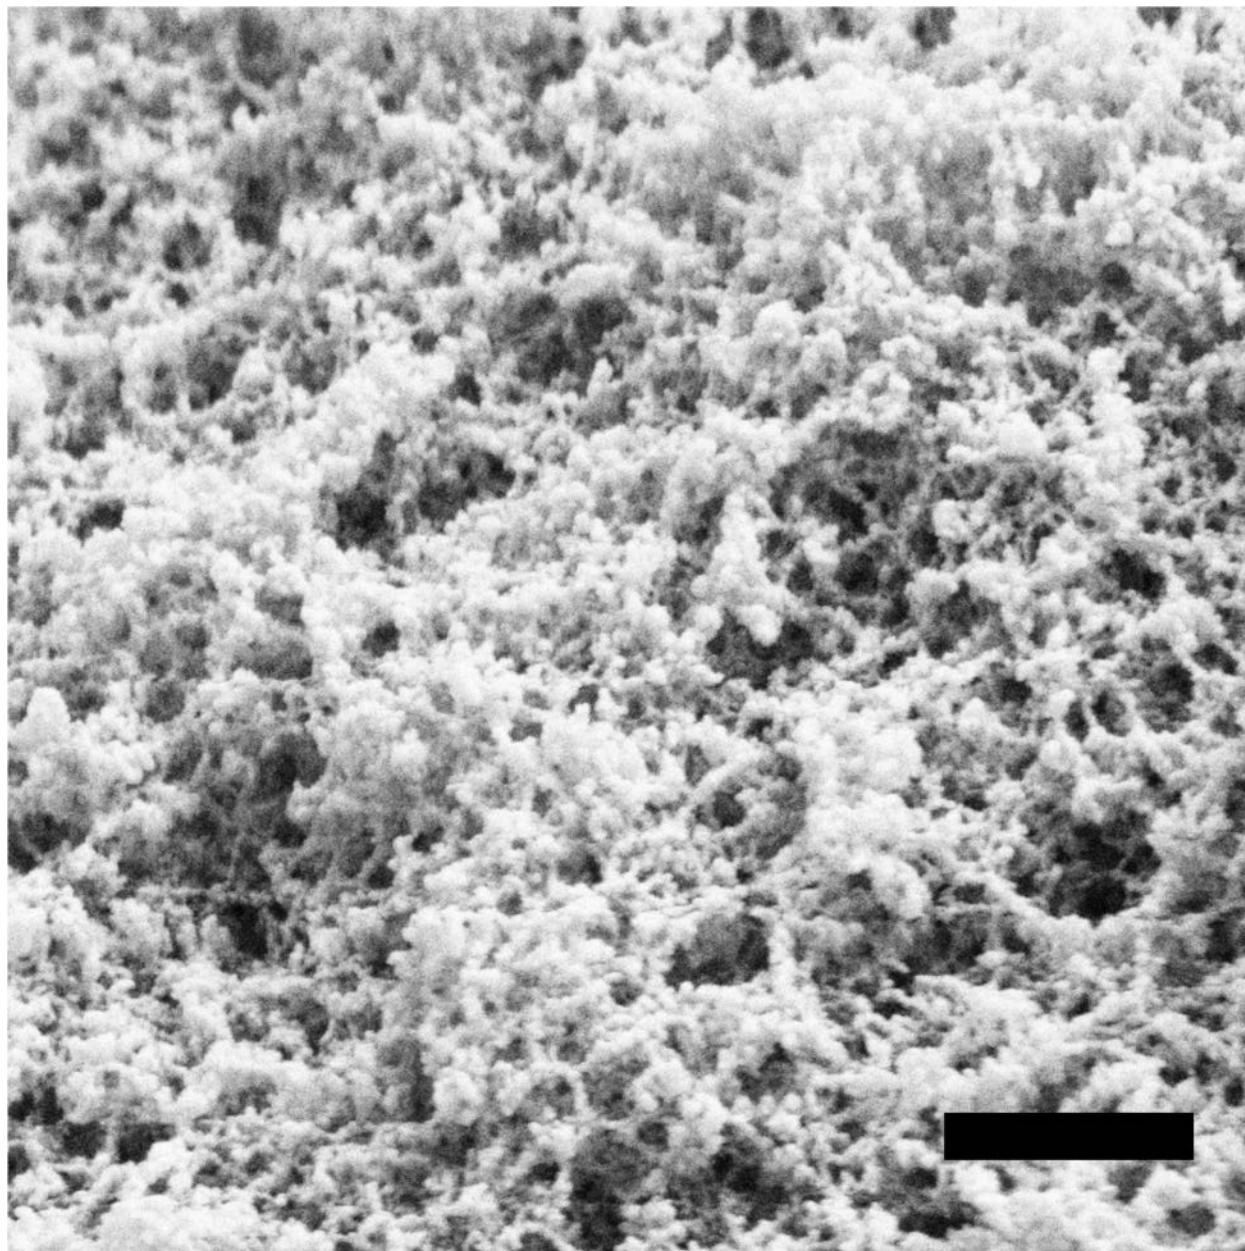

(a) SEM micrograph; scalebar = 1  $\mu\text{m}$ .



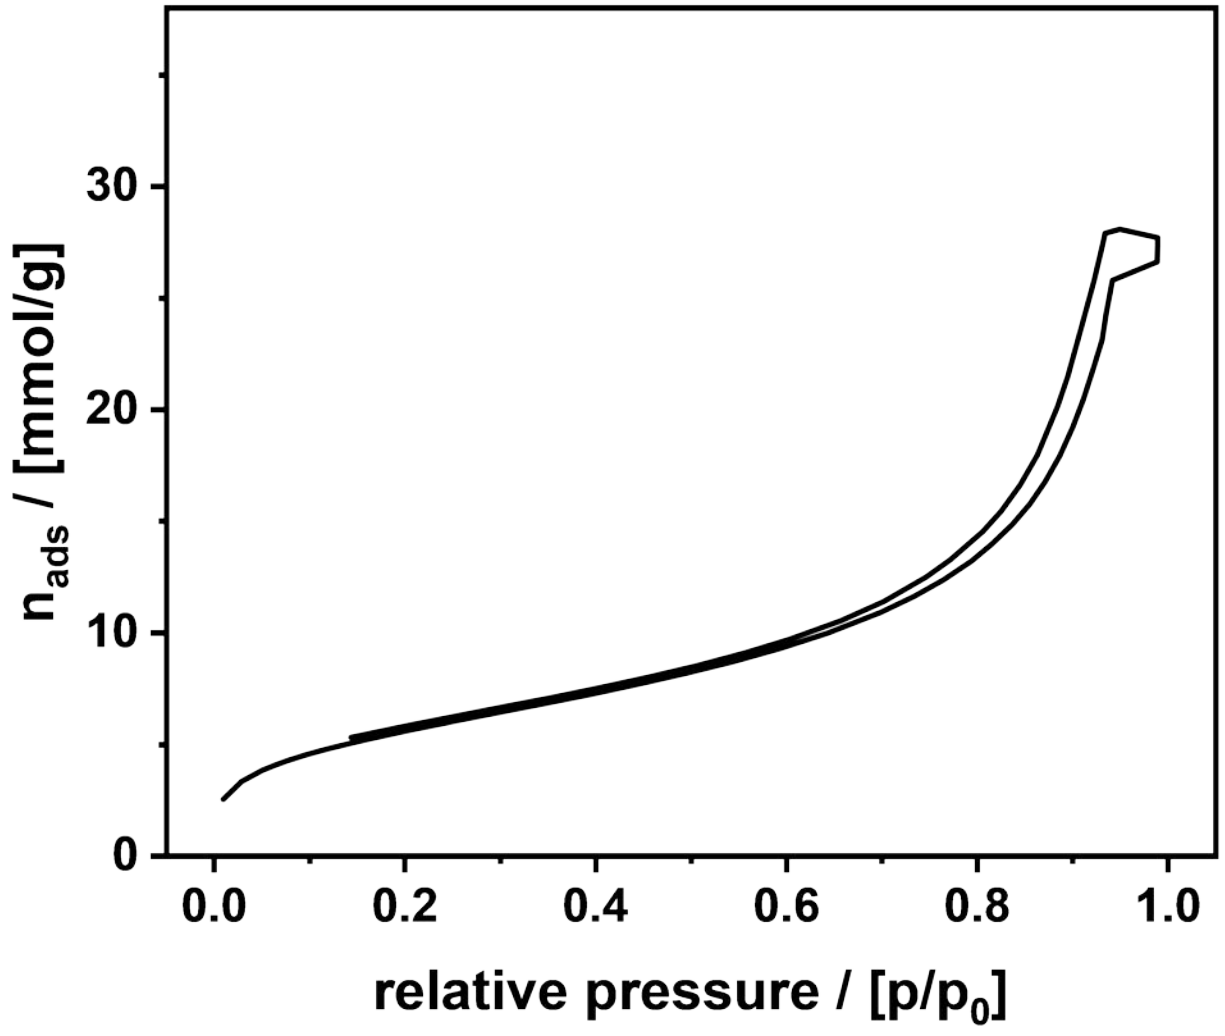

(b) N<sub>2</sub> physisorption isotherm;  $A_{\text{BET}} = 460 \text{ m}^2/\text{g}$ .

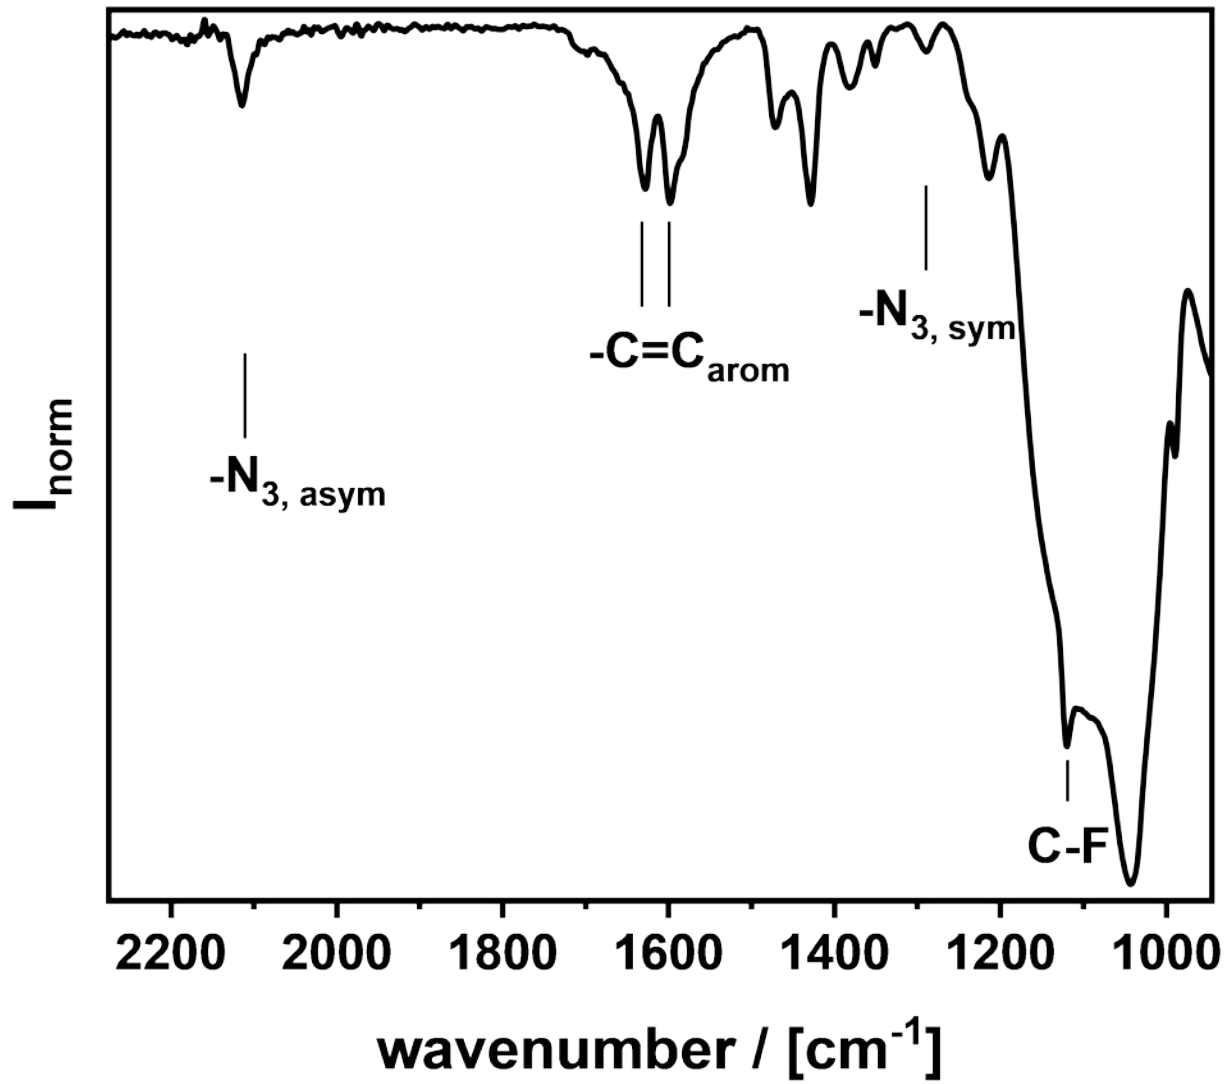

(c) FT-IR spectrum.

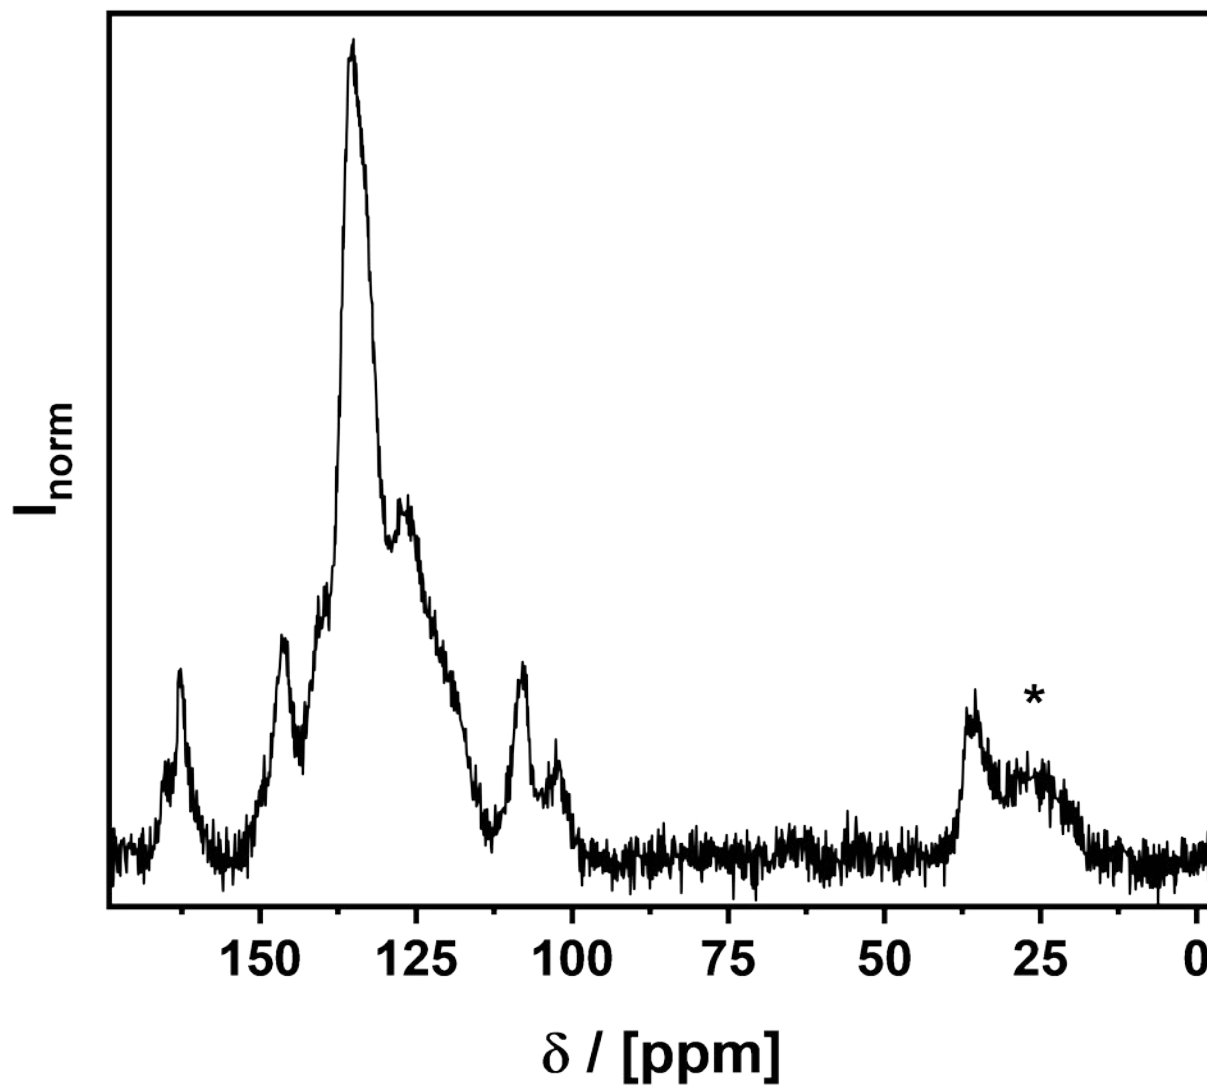

(d)  $^{13}\text{C}$ -MAS NMR. Asterisk (\*) in (C) denotes a spinning side band.

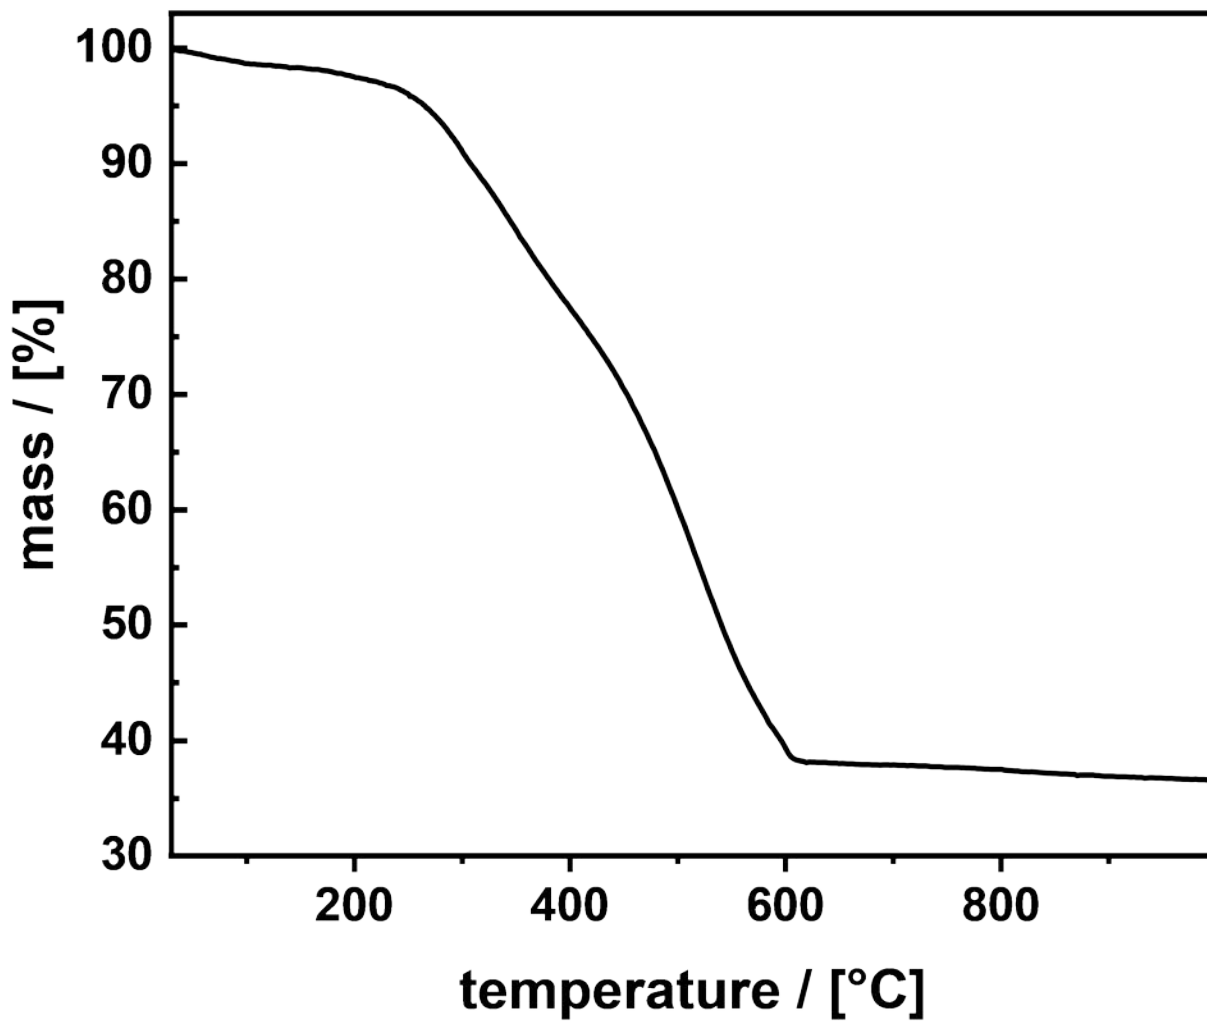

(e) TGA in air.

**Fig. S5. Analytical Data for AmSP(c)Sil.**

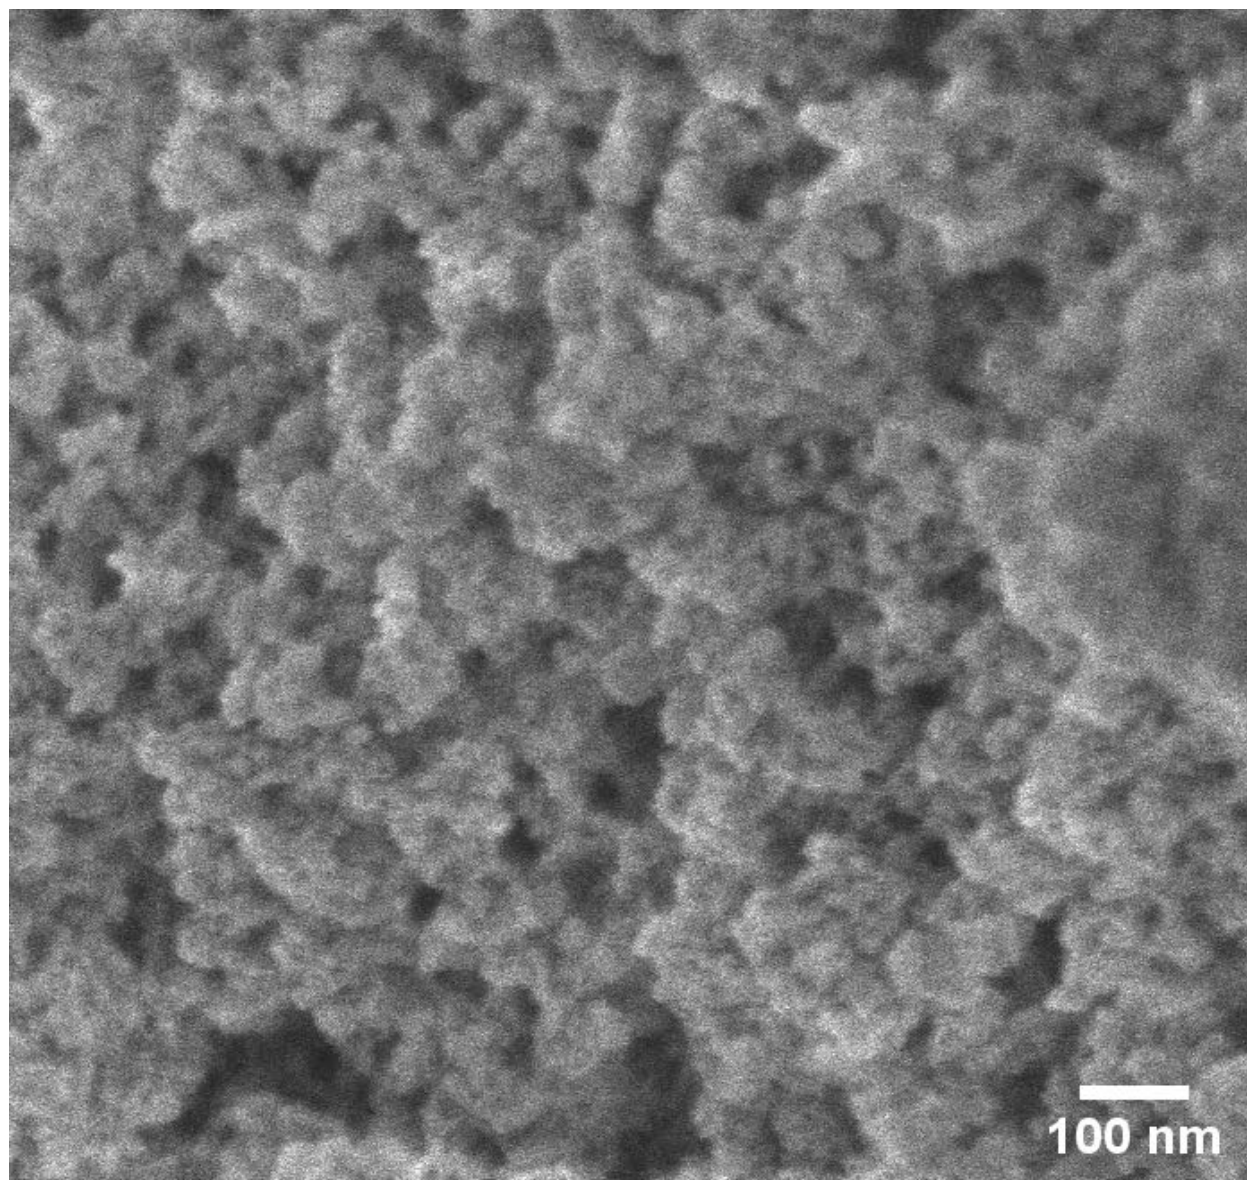

(a) SEM micrograph; scalebar = 1  $\mu$ m.

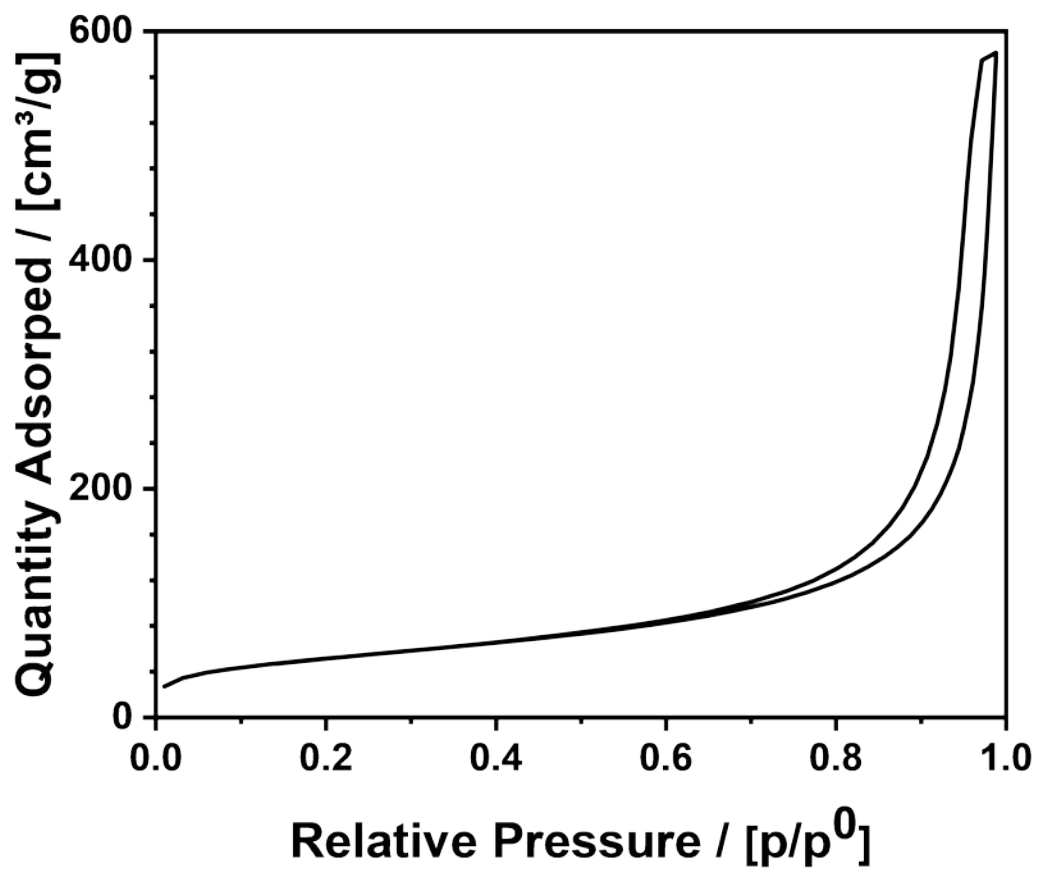

(b) N<sub>2</sub> physisorption isotherm;  $A_{\text{BET}} = 491 \text{ m}^2/\text{g}$ .

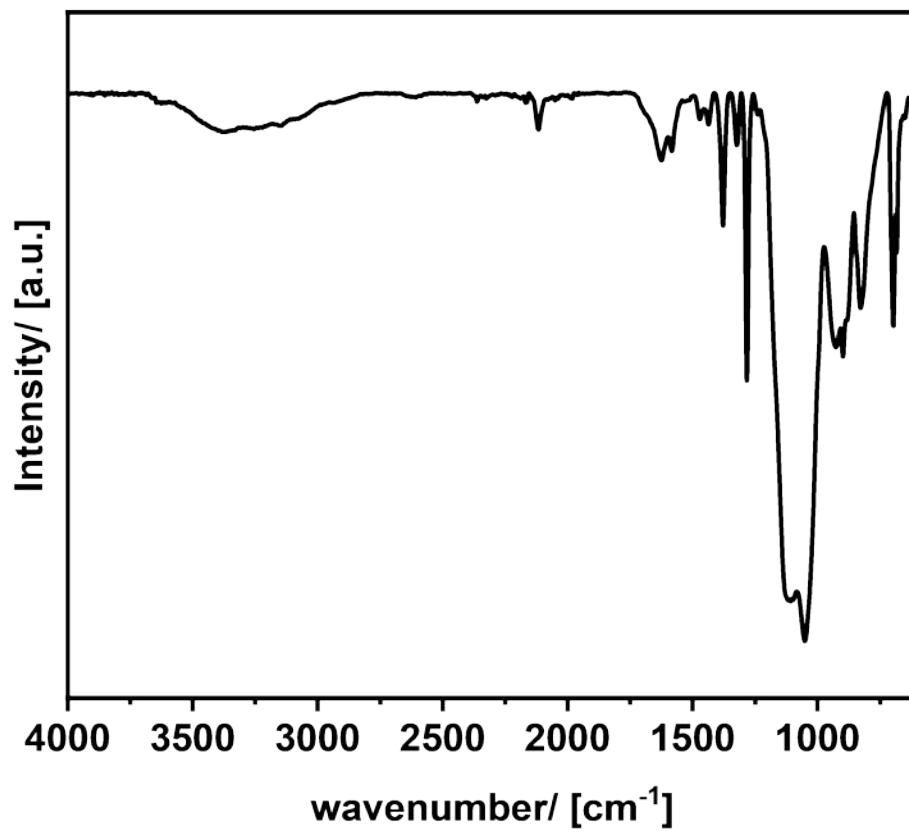

(c) FT-IR spectrum. **ATR-IR:**  $\nu$  (cm<sup>-1</sup>) = 1044 (Si-O), 1114(CF<sub>3</sub>), 1288 (CF<sub>3</sub>), 1316 (C(sp<sup>3</sup>)-C(sp<sup>3</sup>)), 1466 (C(sp<sup>3</sup>)C(sp<sup>3</sup>)), 1578 (NH<sub>3</sub>), 2115 (N<sub>3</sub>), 2851, 2920 (C-H), 3300 (OH)

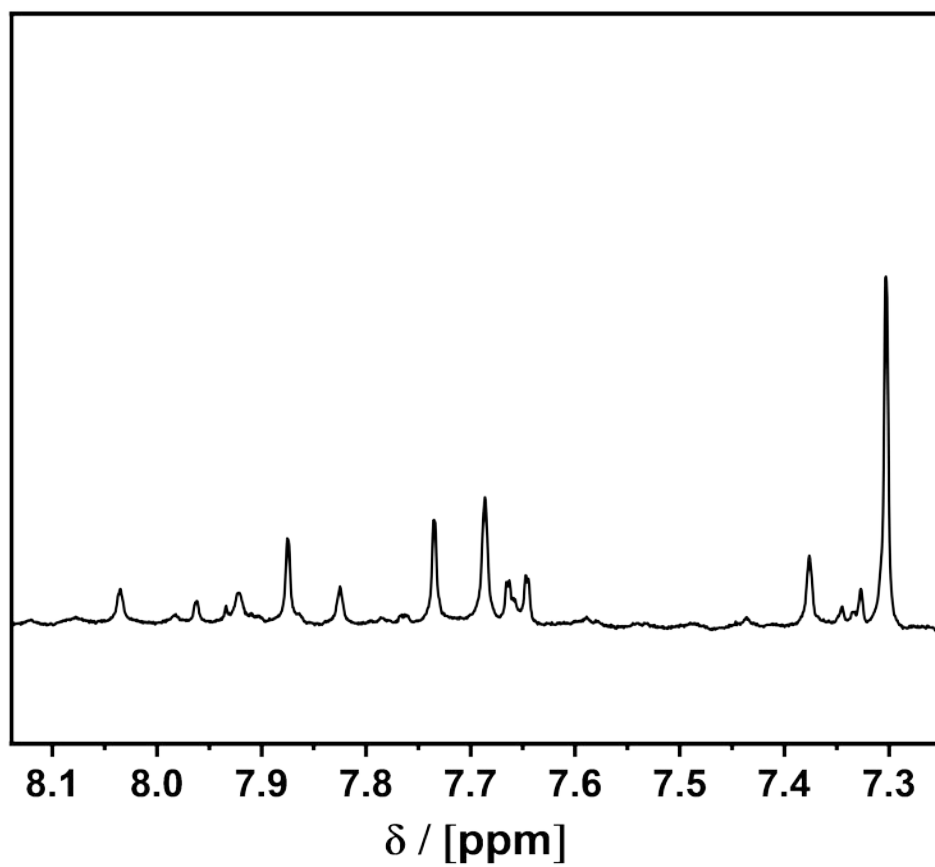

(d) <sup>1</sup>H-NMR of dissolved material.



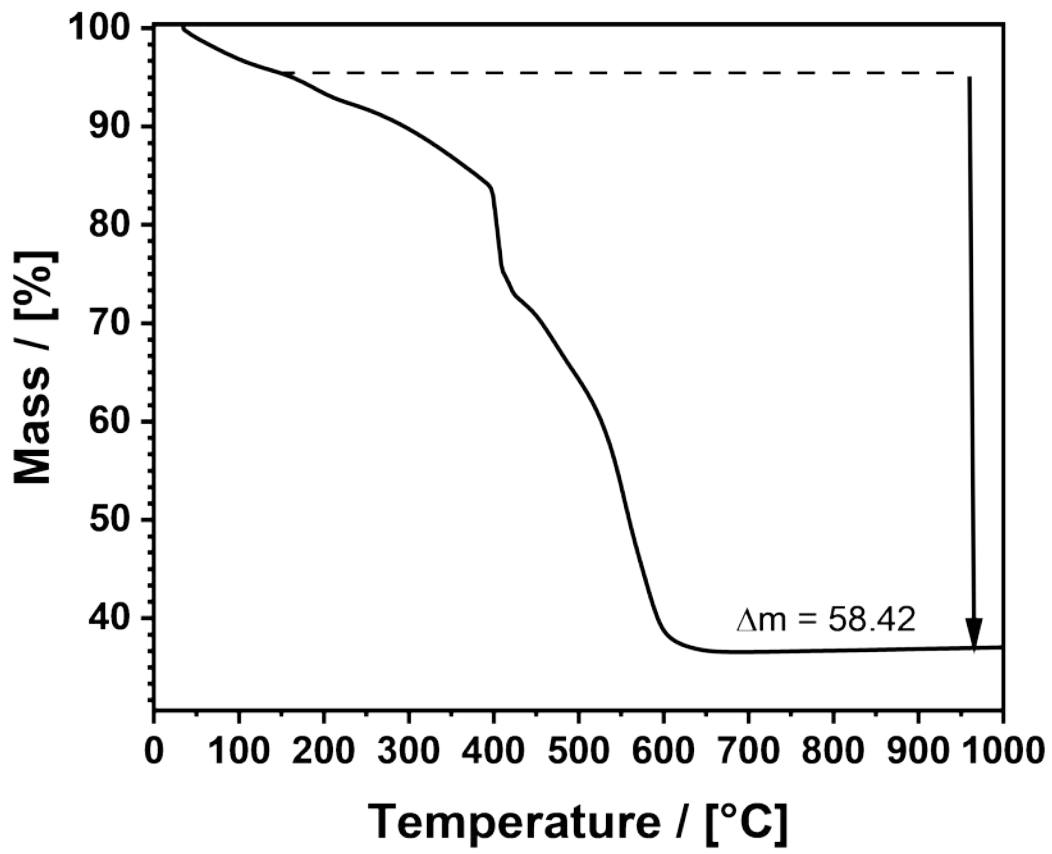

(e) TGA in air.

**Fig. S6. Analytical Data for AmSP(d)Sil.**

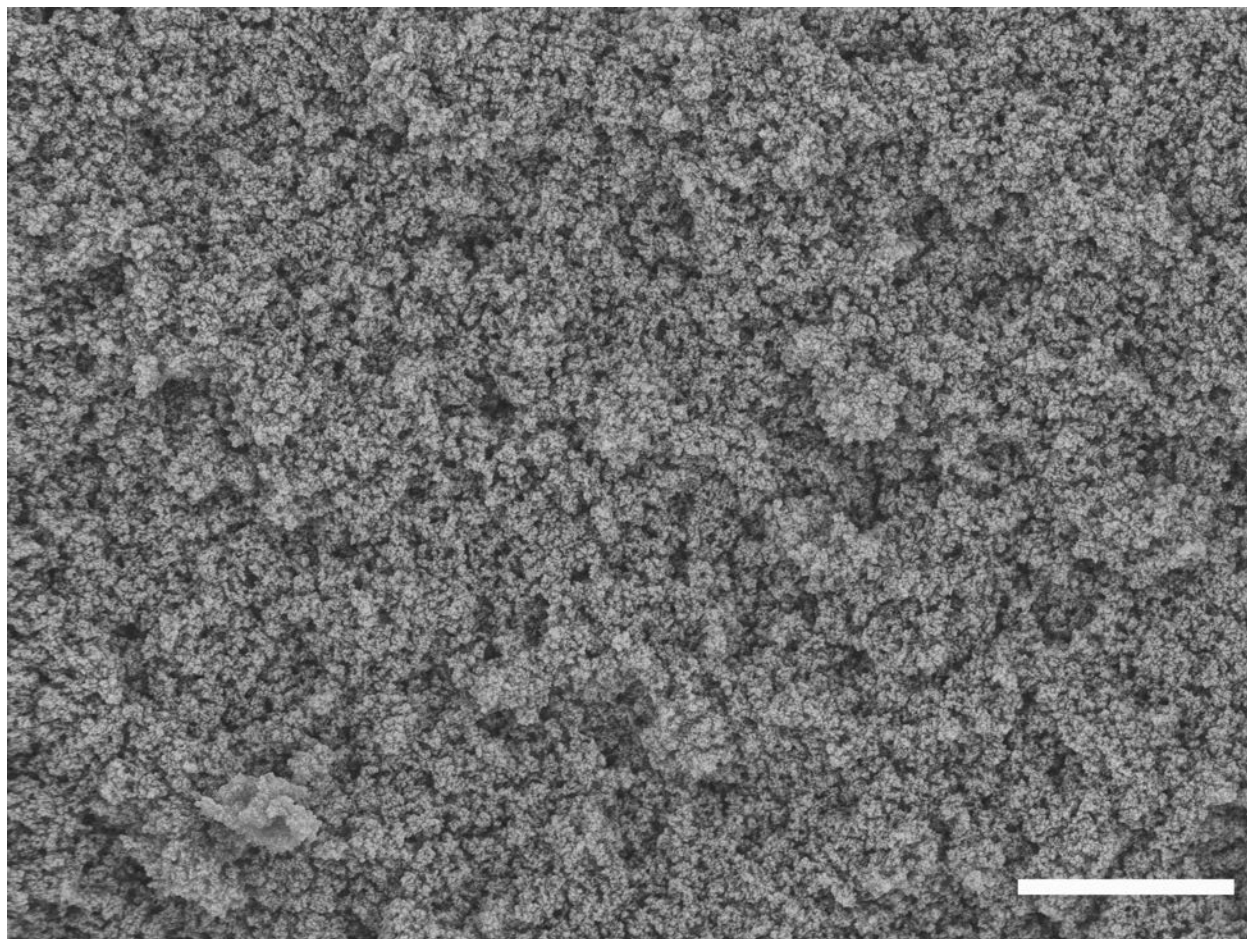

(a) SEM micrograph; scalebar = 5 $\mu$ m.

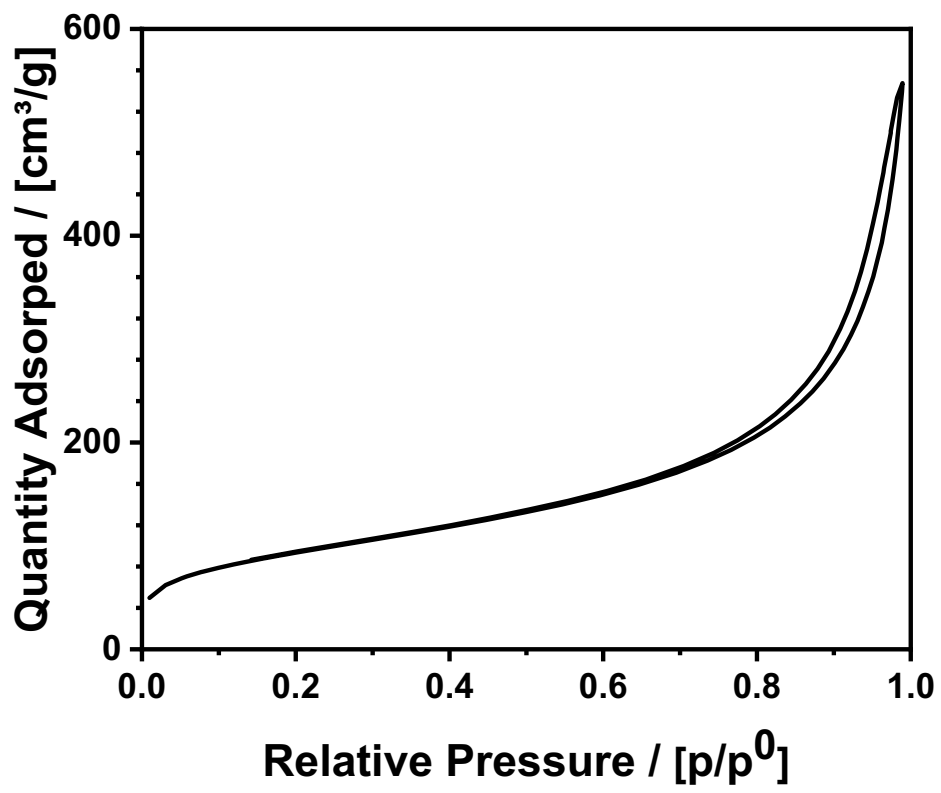

(b) N<sub>2</sub> physisorption isotherm;  $A_{\text{BET}} = 330 \text{ m}^2/\text{g}$ .

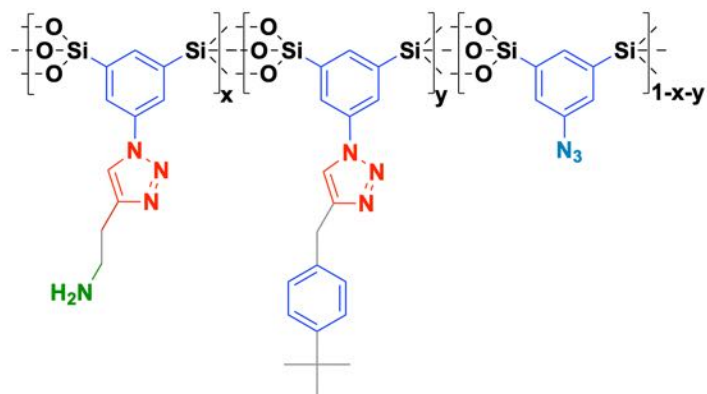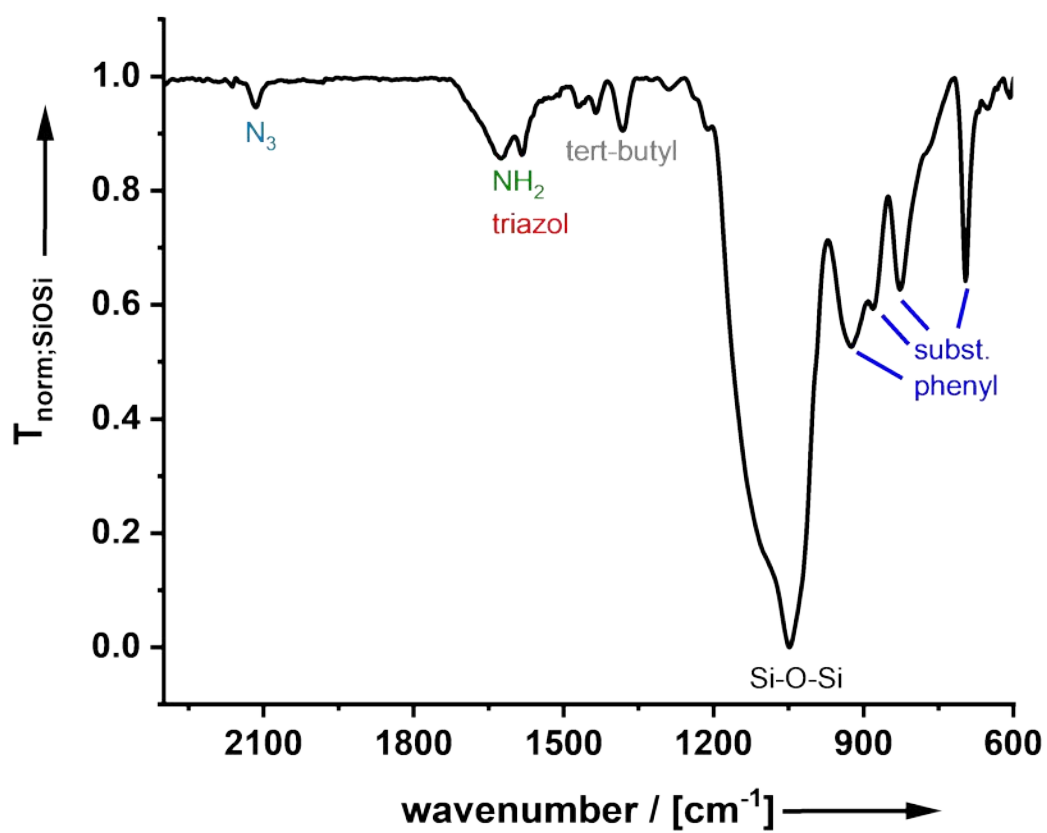

(c) FT-IR spectrum. ATR-IR

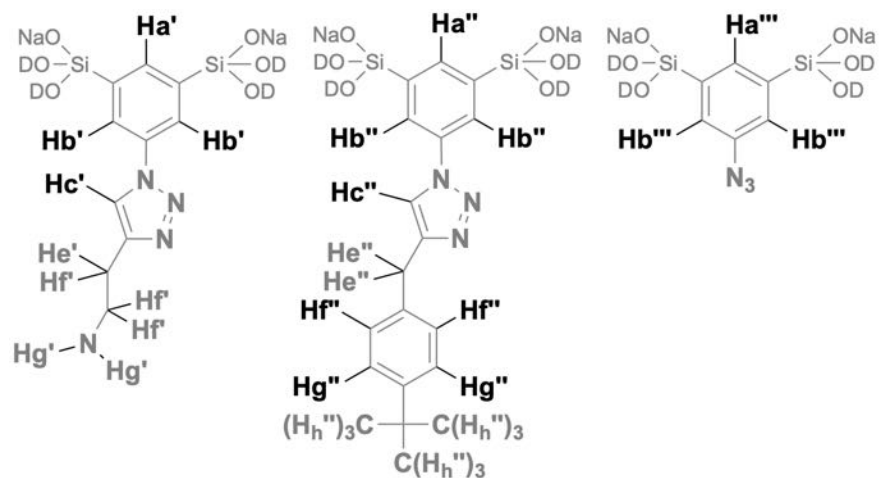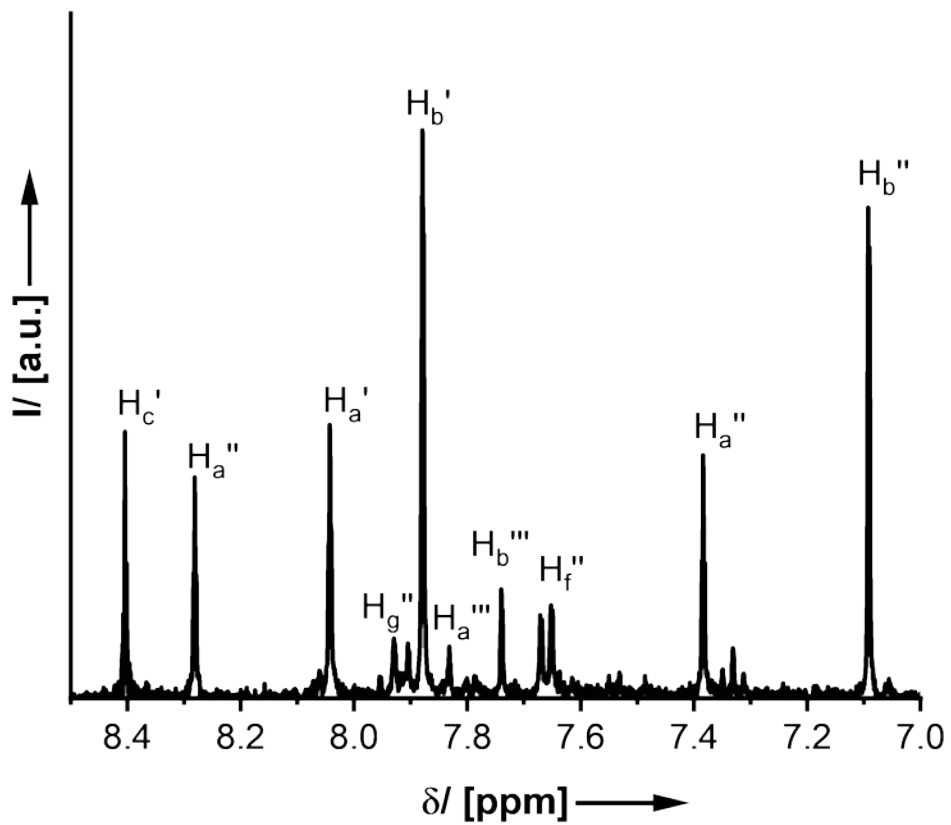

(d)  $^1\text{H-NMR}$  of dissolved material (aromatic region)

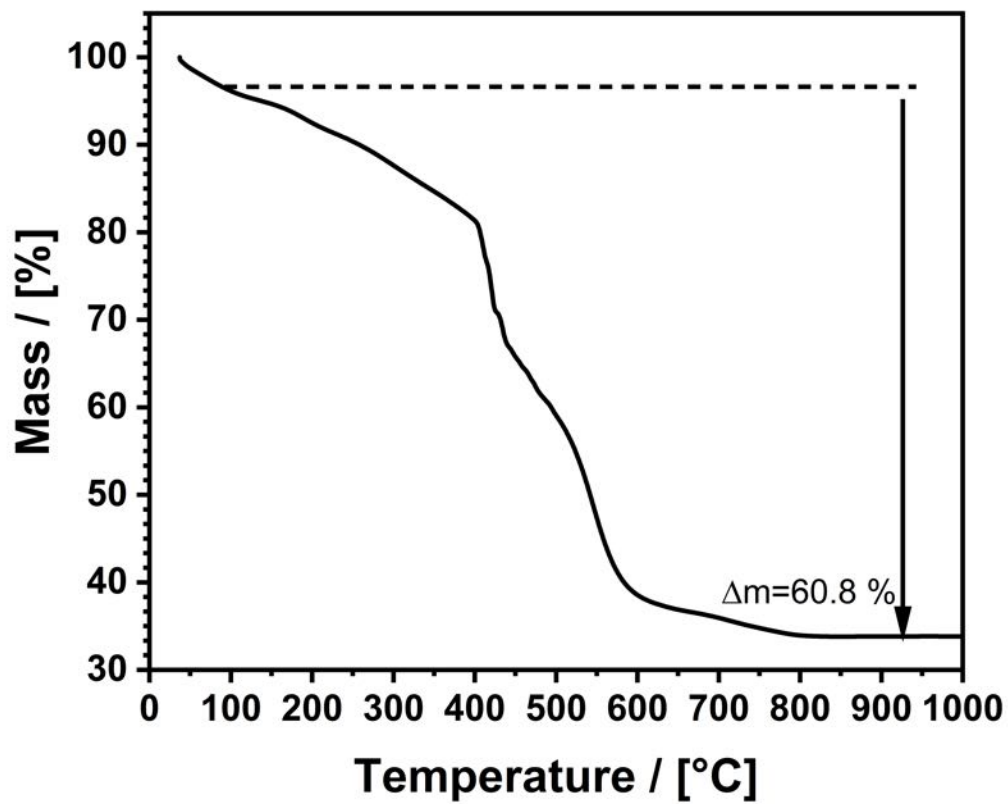

(e) TGA in air.

**Fig. S7. Analytical Data for AmSP(e)Sil.**

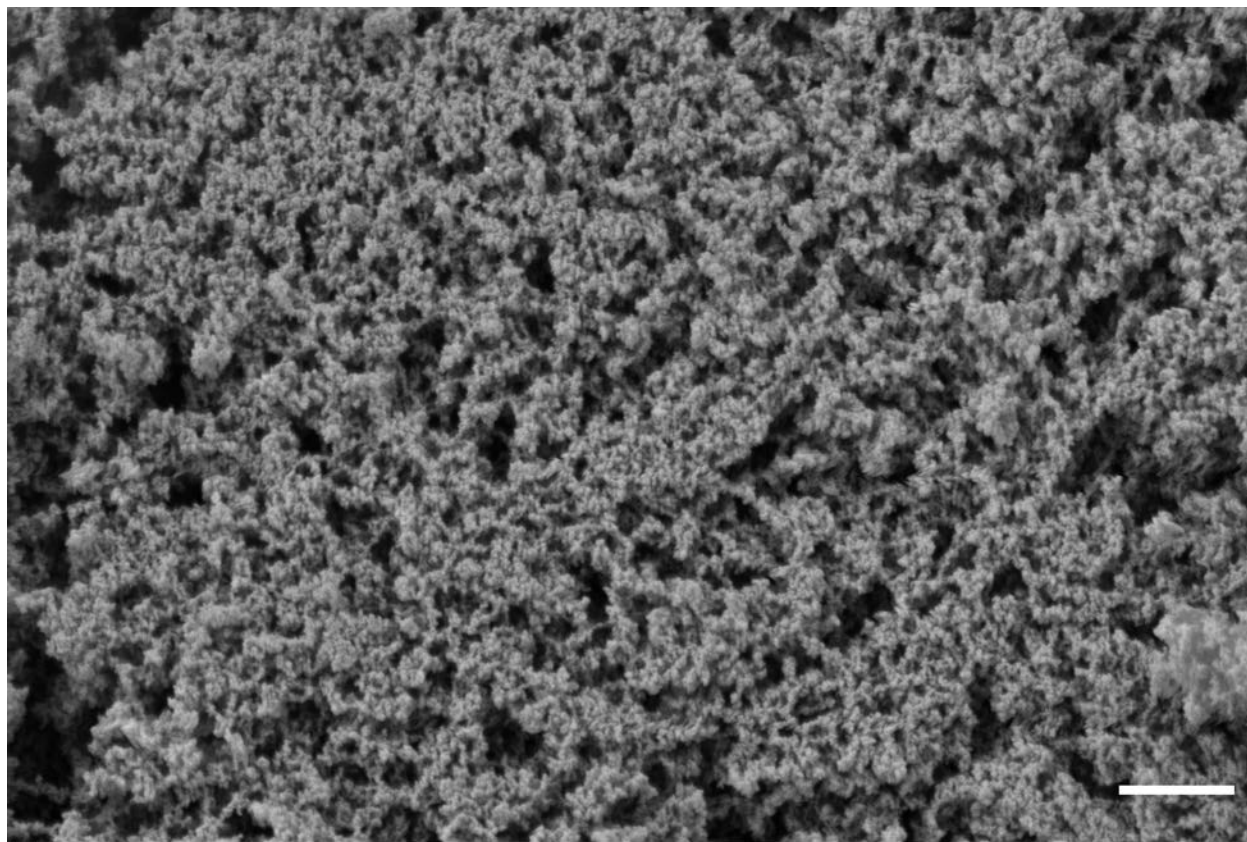

(a) SEM micrograph; scalebar = 1  $\mu\text{m}$ .

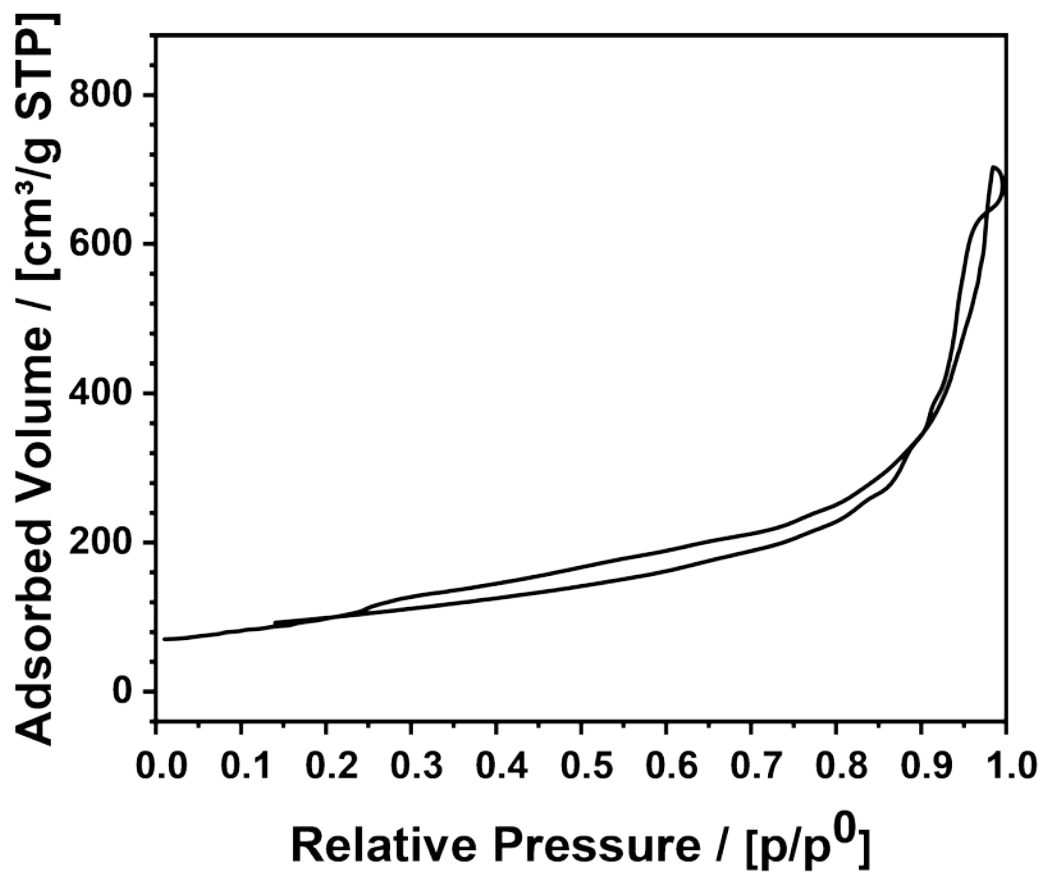

(b) N<sub>2</sub> physisorption isotherm;  $A_{\text{BET}} = 323 \text{ m}^2/\text{g}$ .



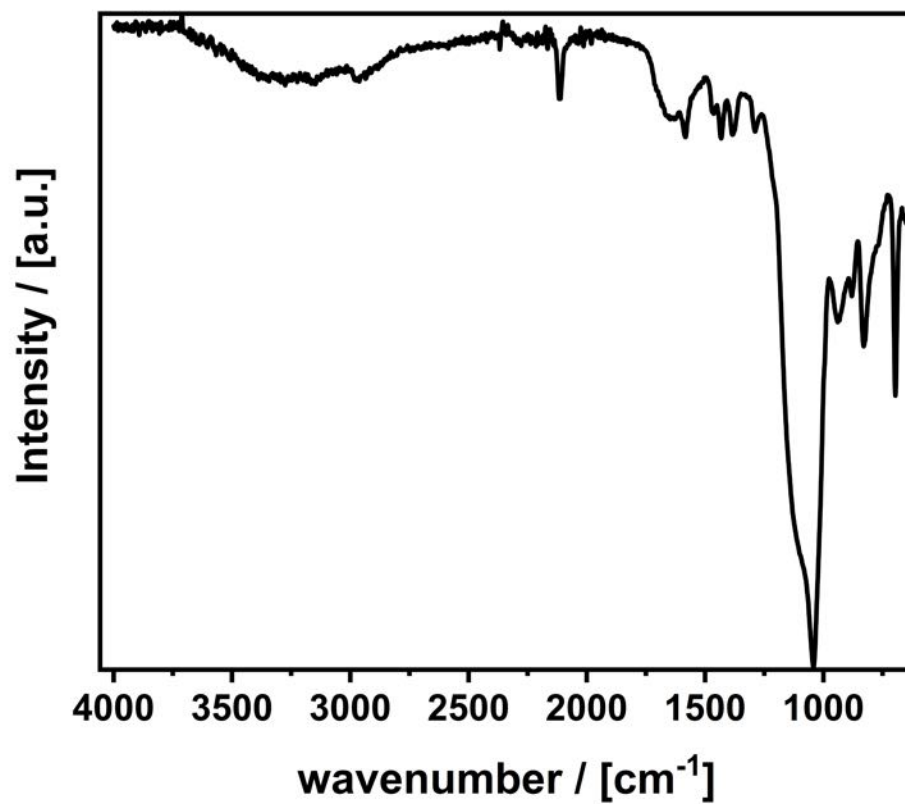

(c) FT-IR spectrum. **ATR-IR:**  $\nu$  (cm<sup>-1</sup>) = 1044 (Si-O), 1316 (C(sp<sup>3</sup>)-C(sp<sup>3</sup>)), 1466 (C(sp<sup>3</sup>)C(sp<sup>3</sup>)), 1578 (def. OH), 1623, 2115 (N<sub>3</sub>), 2851, 2920 (C-H), 3300 (OH)

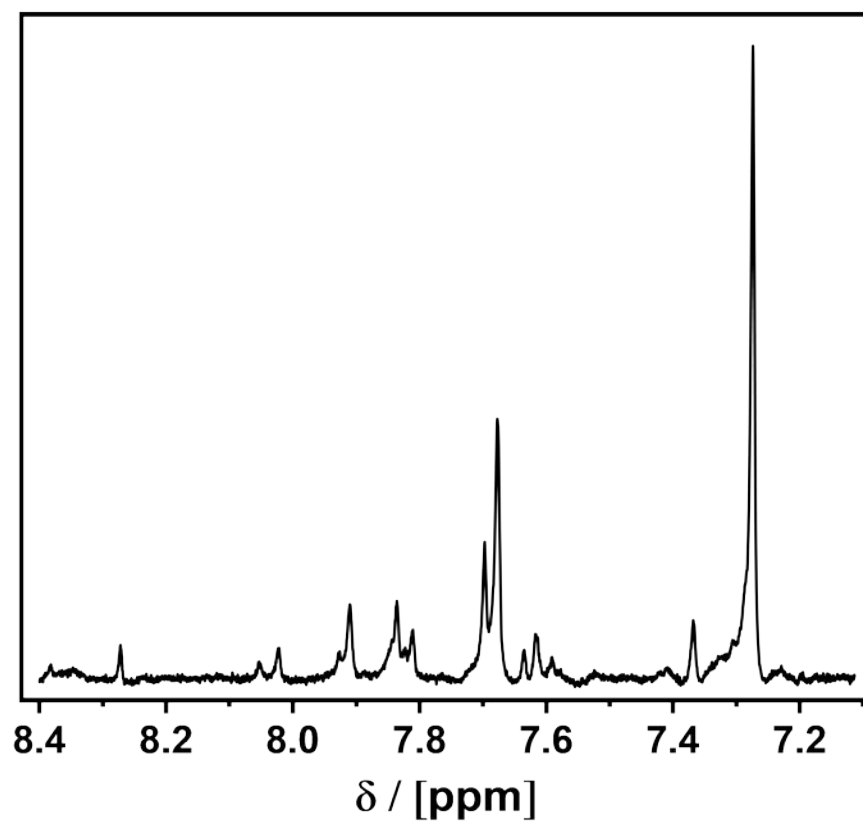

(d)  $^1\text{H-NMR}$  of dissolved material.

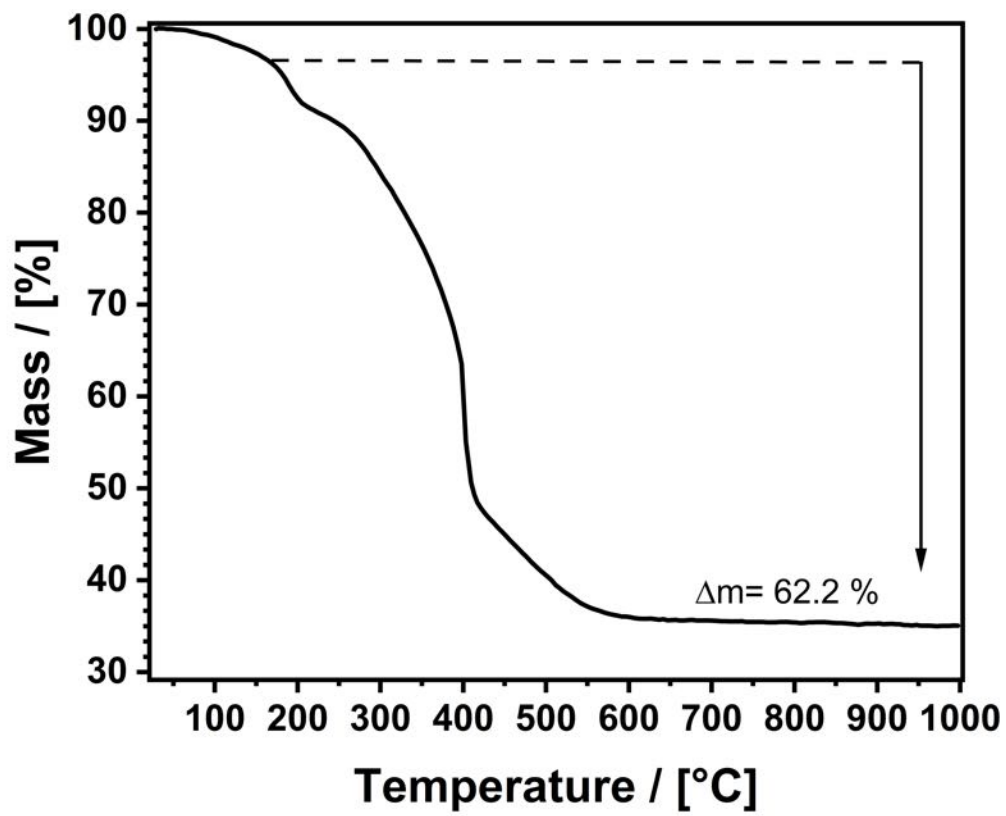

(e) TGA in air.

**Fig. S8. Analytical Data for AmSP(f)Sil.**

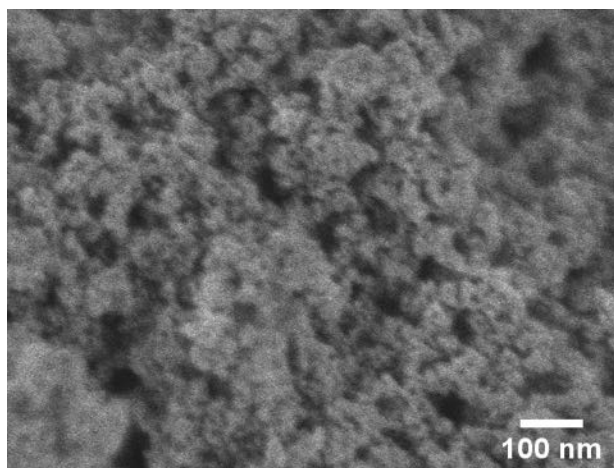

(a) SEM micrograph; scalebar = 100 nm.

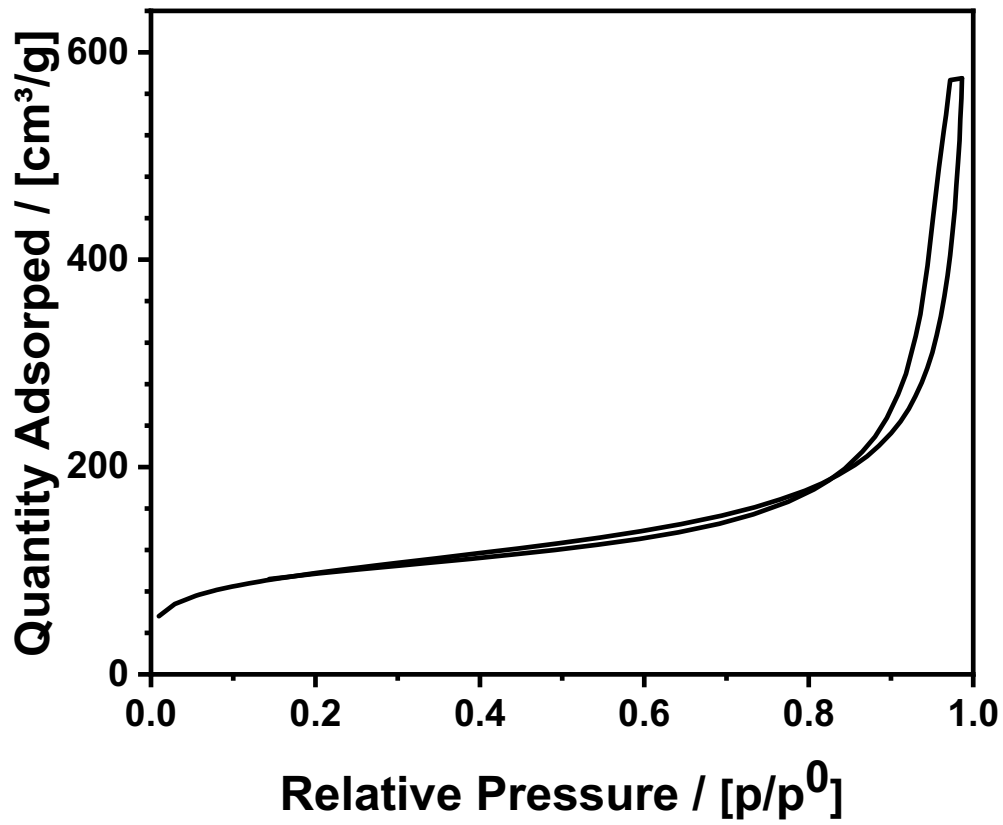

(b) N<sub>2</sub> physisorption isotherm;  $A_{\text{BET}} = 351 \text{ m}^2/\text{g}$ .

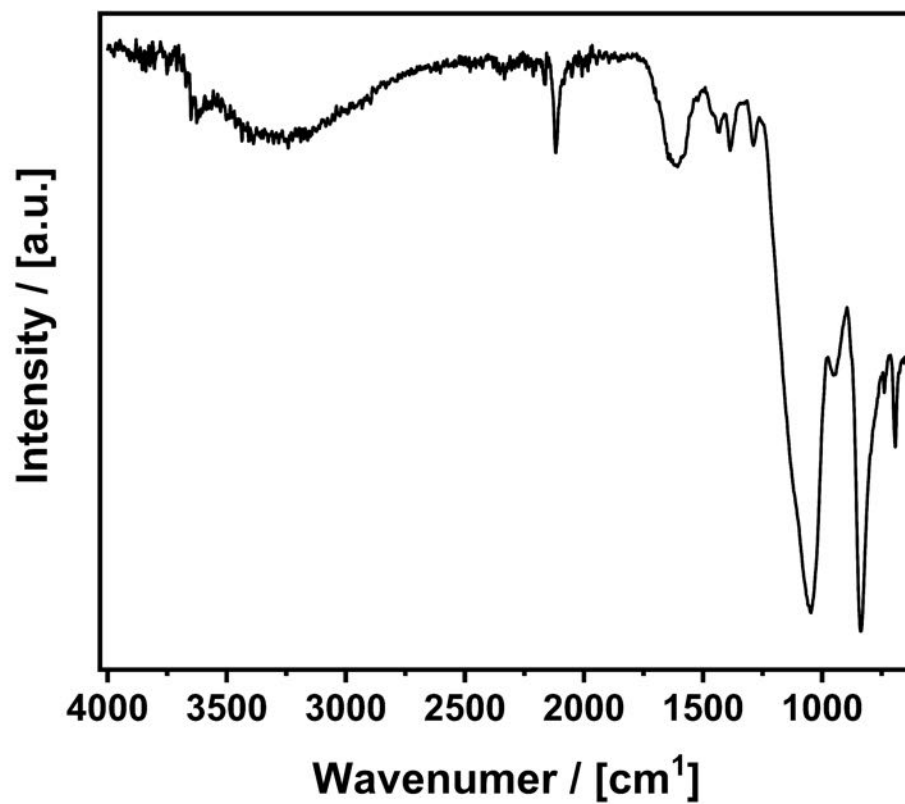

(c) FT-IR spectrum. **ATR-IR:**  $\nu$  (cm<sup>-1</sup>) = 1044 (Si-O), 1316 (C(sp<sup>3</sup>)-C(sp<sup>3</sup>)), 1466 (C(sp<sup>3</sup>)C(sp<sup>3</sup>)), 1578 (NH<sub>3</sub>) 2115 (N<sub>3</sub>), 2851, 2920 (C-H), 3300 (OH)

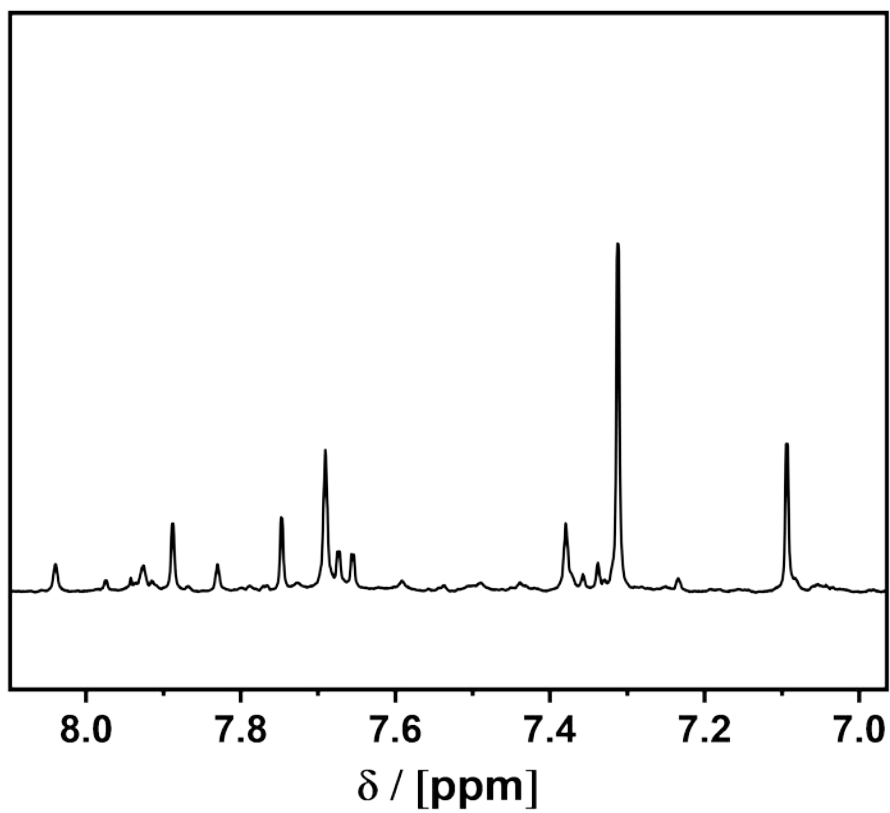

(d) <sup>1</sup>H-NMR of dissolved material.

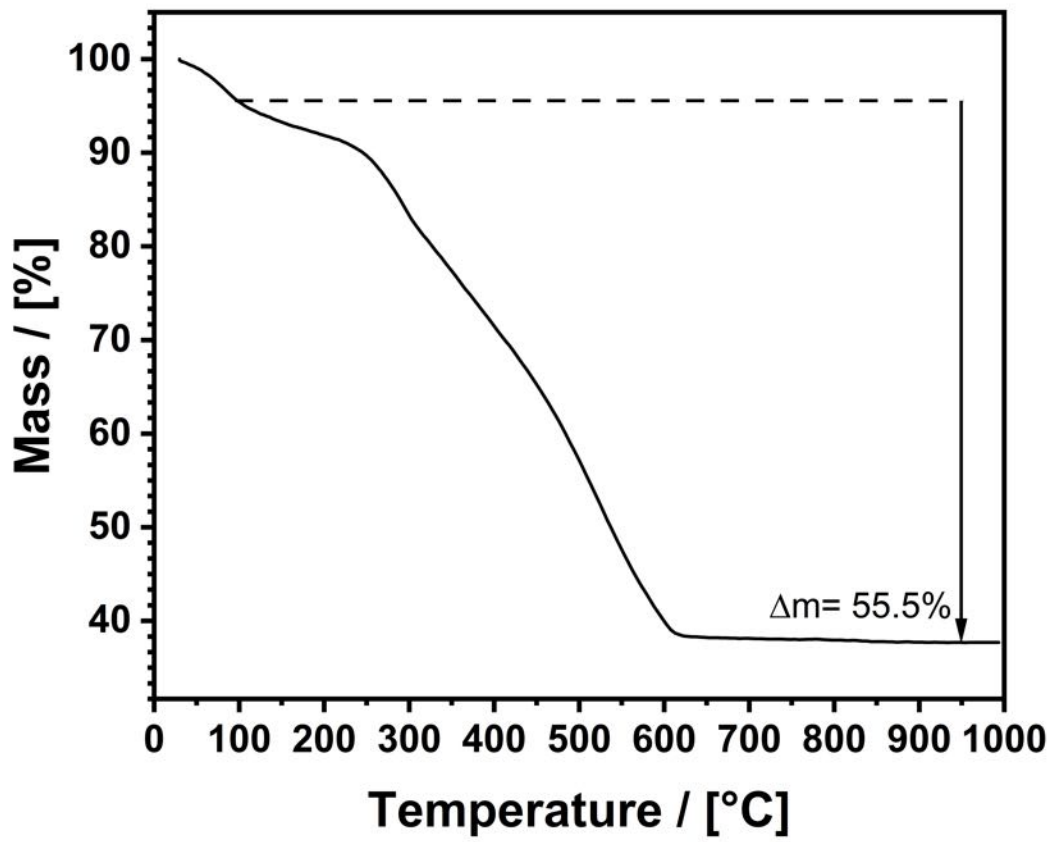

(e) TGA in air.



Fig. S9. H<sub>2</sub>O adsorption on organosilica materials.

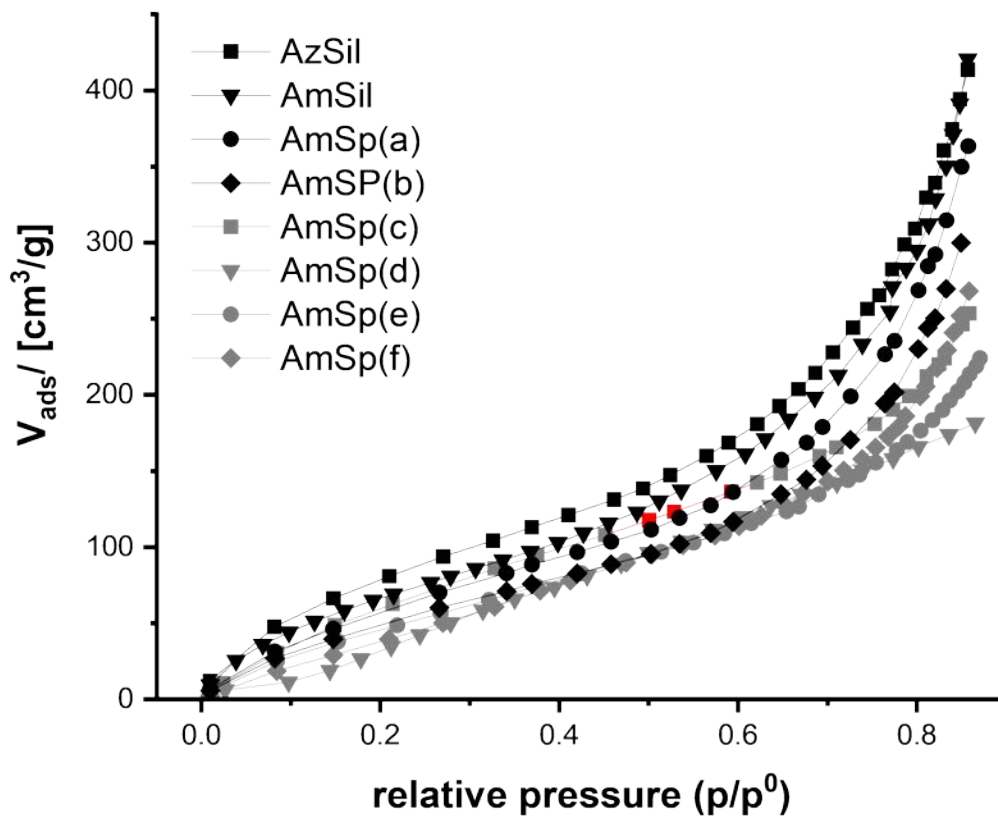

Fig. S10. Carbon Dioxide Adsorption

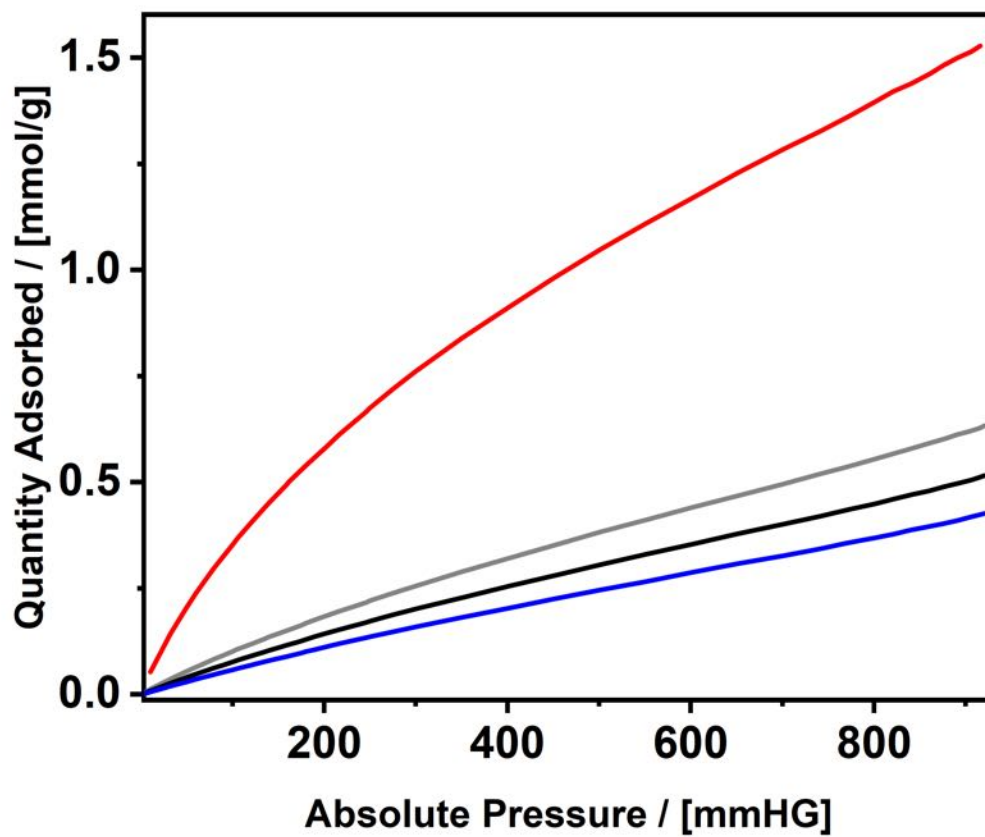

(a) CO<sub>2</sub>(g) adsorption isotherms of AmSil measured at T = 0°C (red), 30°C (grey), 40°C (black), 50°C (blue).

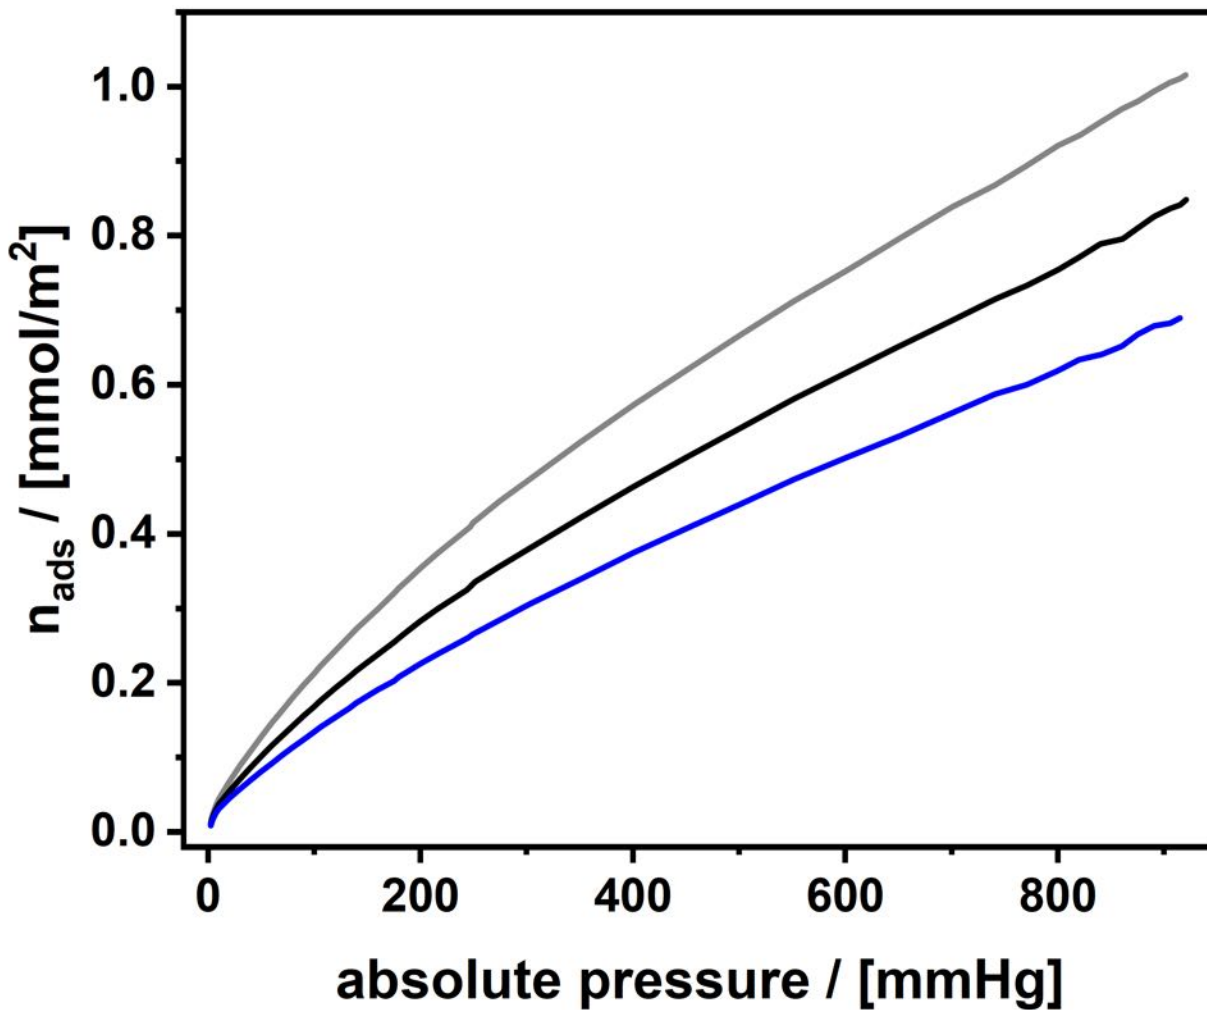

(b) CO<sub>2</sub>(g) adsorption isotherms of AmSp(a) measured at T = 0°C (red), 30°C (grey), 40°C (black), 50°C (blue).

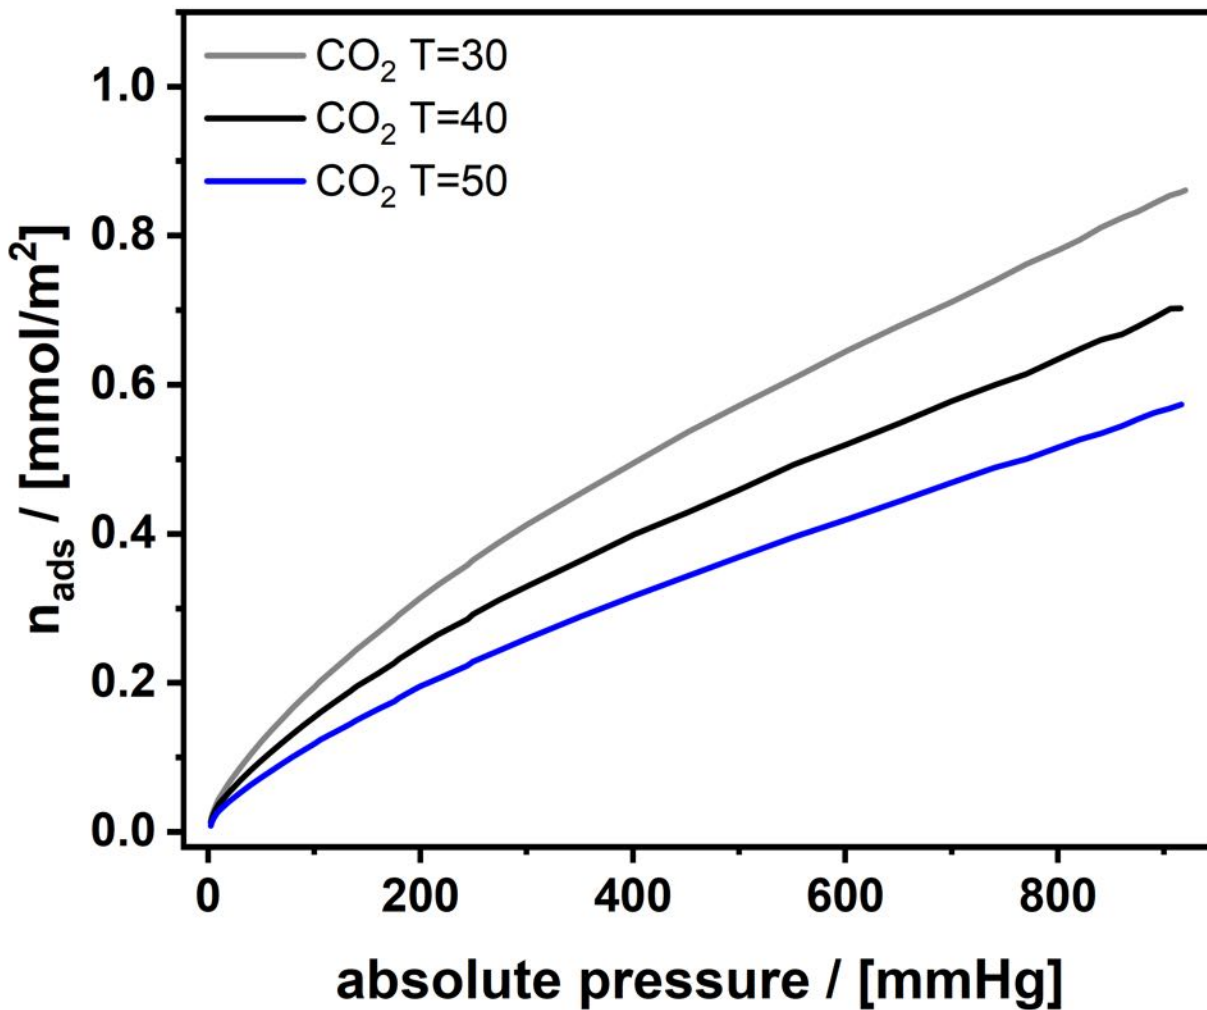

(c) CO<sub>2</sub>(g) adsorption isotherms of AmSp(b) measured at T = 0°C (red), 30°C (grey), 40°C (black), 50°C (blue).

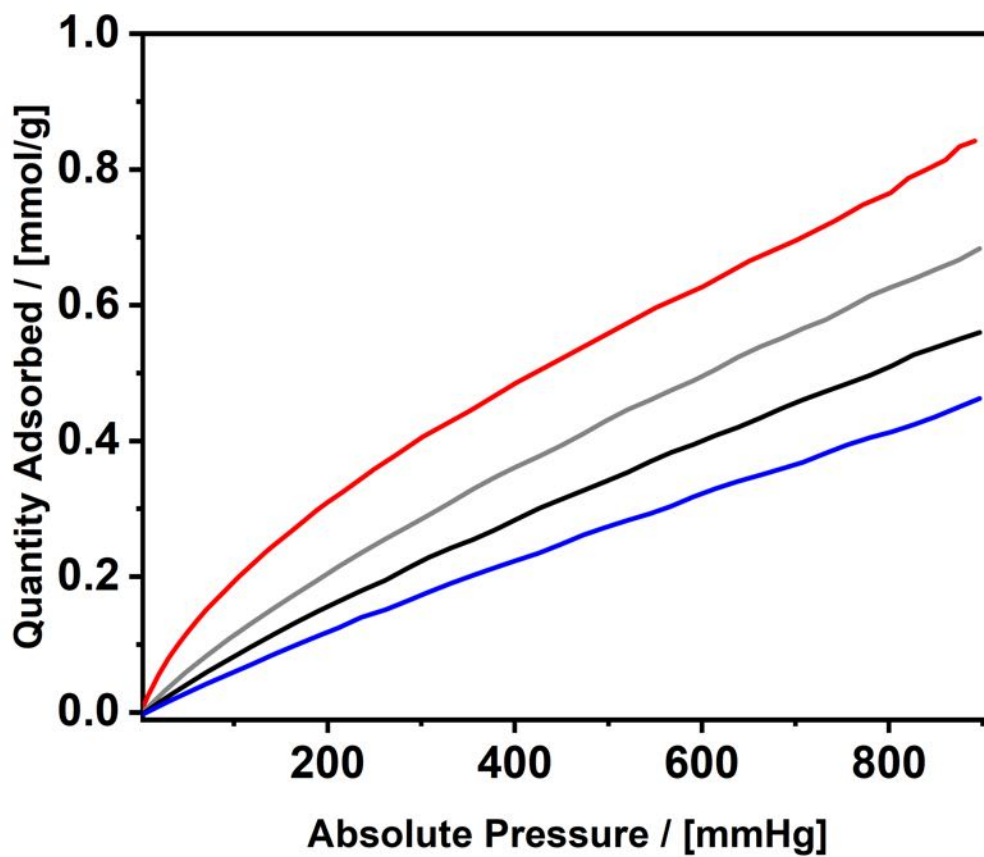

(d) CO<sub>2</sub>(g) adsorption isotherms of AmSp(c) measured at T = 0°C (red), 30°C (grey), 40°C (black), 50°C (blue).

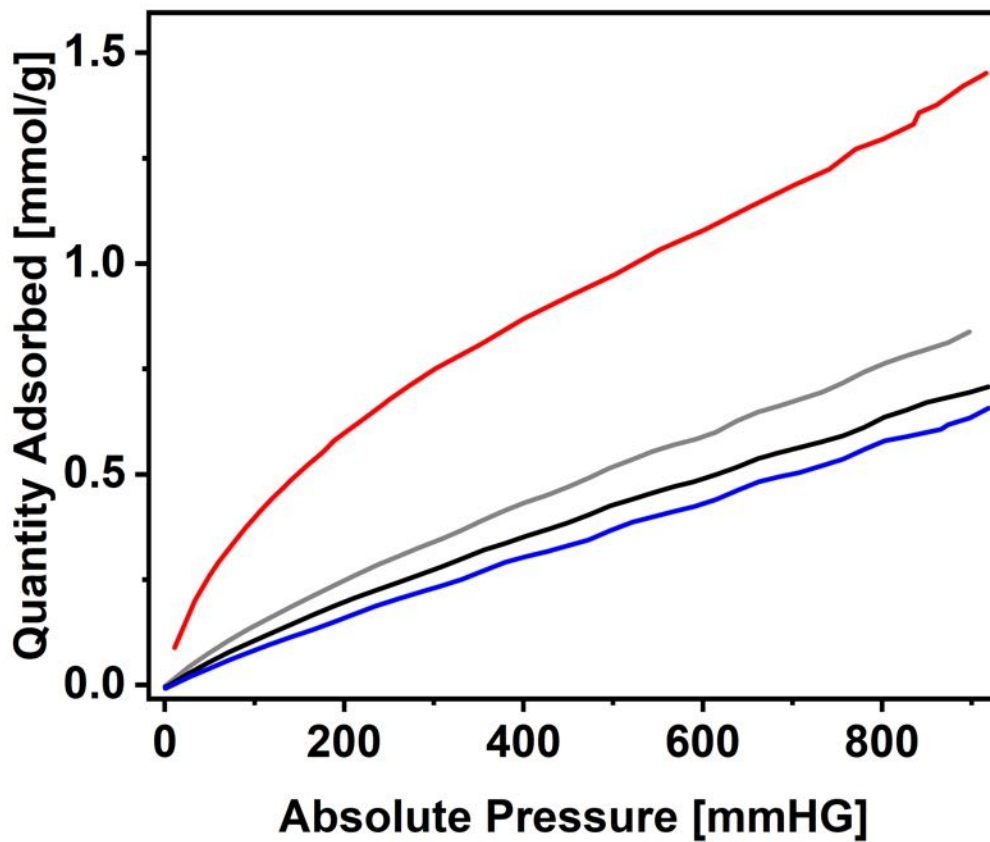

(e) CO<sub>2</sub>(g) adsorption isotherms of AmSp(d) measured at T = 0°C (red), 30°C (grey), 40°C (black), 50°C (blue).

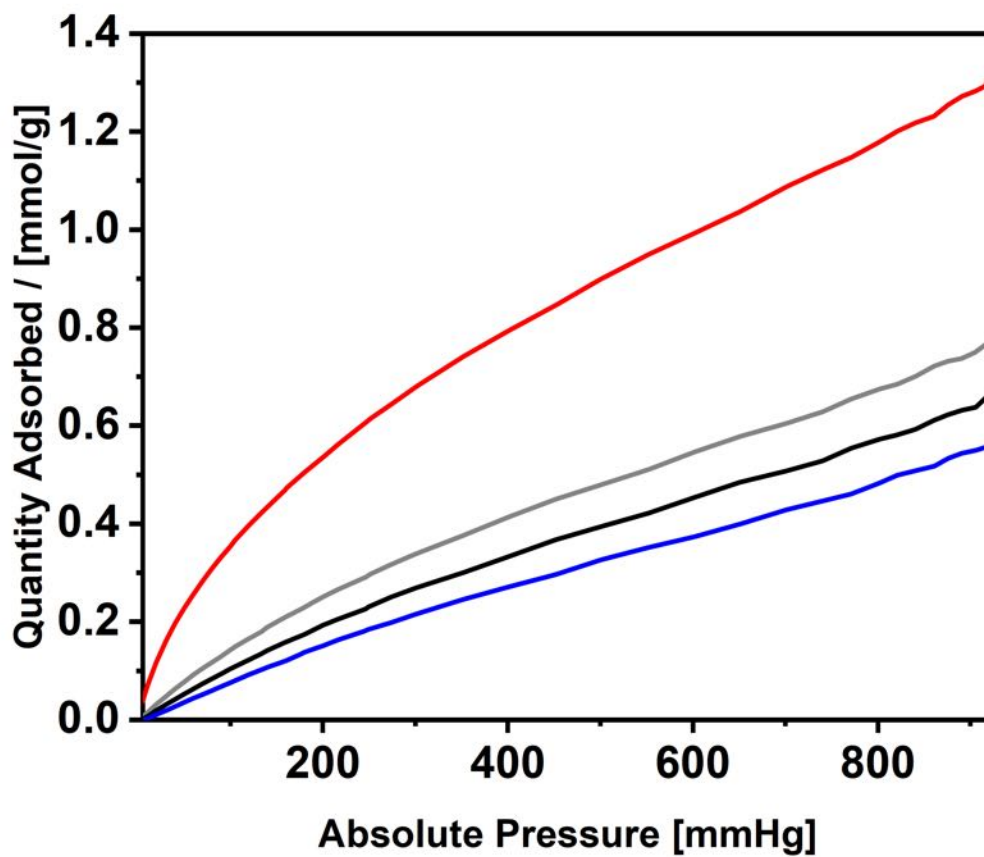

(f) CO<sub>2</sub>(g) adsorption isotherms of AmSp(e) measured at T = 0°C (red), 30°C (grey), 40°C (black), 50°C (blue).

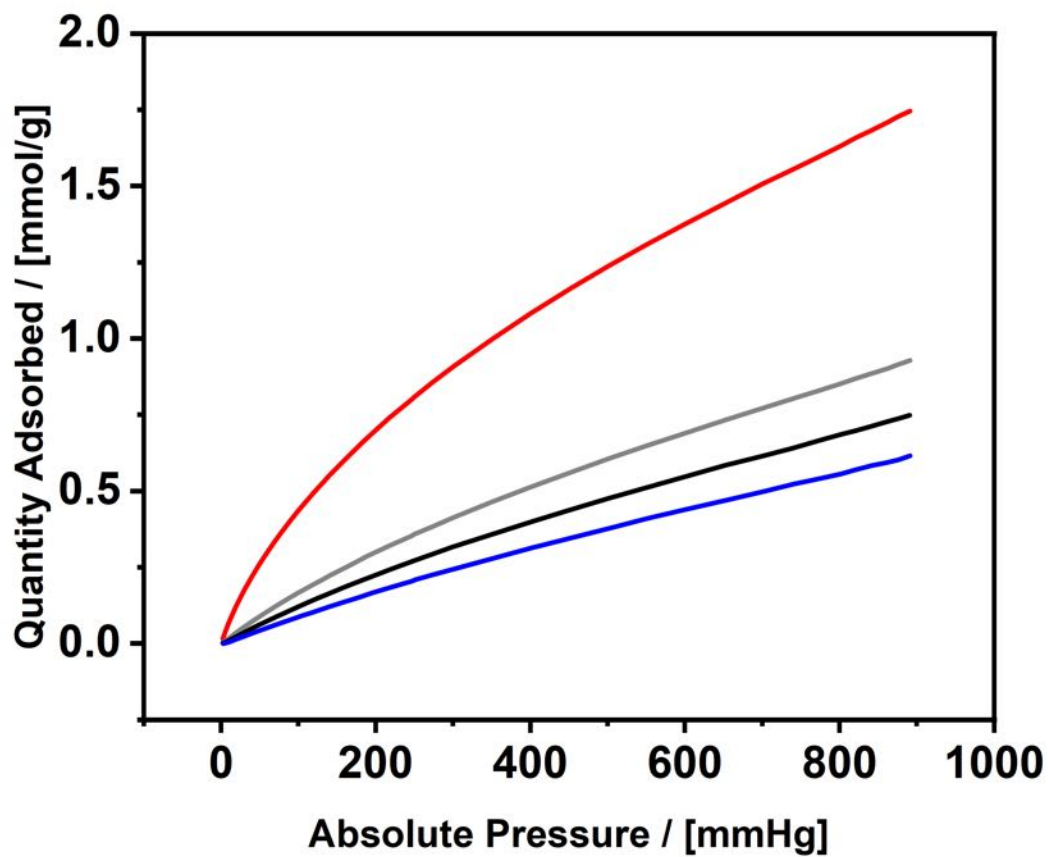

(g) CO<sub>2</sub>(g) adsorption isotherms of AmSp(f) measured at T = 0°C (red), 30°C (grey), 40°C (black), 50°C (blue).



Fig. S11. Gradient Material

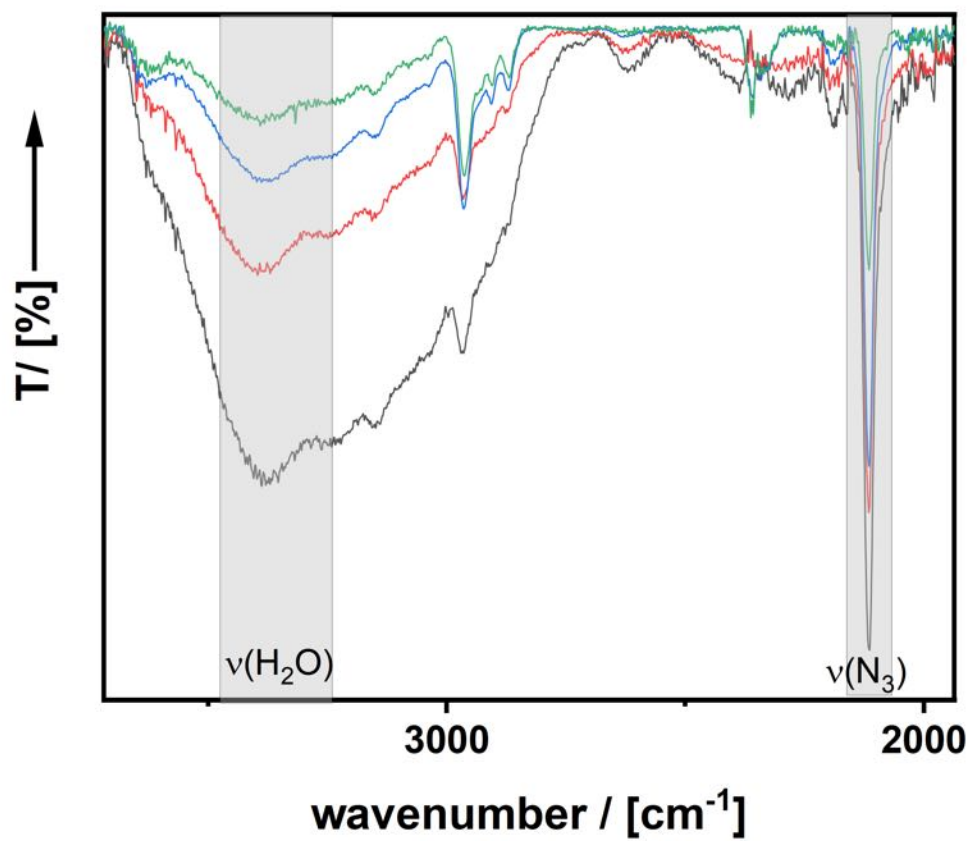

IR spectra recorded along the gradient.
